# Supplementary material for: Benzoic acid resin (BAR): a heterogeneous redox organocatalyst for continuous flow synthesis of benzoquinones from β-O-4 lignin models
Source: Royal Society of Chemistry journal article supplement (doi:10.1039/d0gc04231e), 2021-01-01
Supplement: d0gc04231e1.pdf [file d0gc04231e1.pdf]

# Benzoic Acid Resin (BAR): A Heterogeneous Redox Organocatalyst for Continuous Flow Synthesis of Benzoquinones from $\beta$ -O-4 Lignin Models

Kevin de Aquino Dias,<sup>a</sup> Marcus Vinicius Pinto Pereira Junior<sup>a,b</sup> and  
Leandro Helgueira Andrade<sup>\*a</sup>

<sup>a</sup> *Institute of Chemistry, University of São Paulo, Av. Prof. Lineu Prestes 748, SP 05508-900, São Paulo (Brazil).*

<sup>b</sup> *Connecticut College, 270 Mohegan Avenue, New London, CT 06320, EUA.*

\*e-mail: [leandroh@iq.usp.br](mailto:leandroh@iq.usp.br)

## Supporting Information

### Table of Contents

|                                                                                                              |     |
|--------------------------------------------------------------------------------------------------------------|-----|
| <b>General</b> _____                                                                                         | S2  |
| <b>Synthesis and Characterization of the Benzoic Acid Resin (BAR)</b> _____                                  | S3  |
| <b>Assembly for Continuous Flow Oxidations of <math>\beta</math>-O-4 Lignin Models Mediated by BAR</b> _____ | S4  |
| <b>Synthesis of the <math>\beta</math>-O-4 Lignin Models</b> _____                                           | S5  |
| <b>NMR Data for the Products (Table 3)</b> _____                                                             | S9  |
| <b>References</b> _____                                                                                      | S14 |
| <b>NMR Spectra of the <math>\beta</math>-O-4 Lignin Models and Products (Table 3)</b> _____                  | S15 |

## General

**Chemicals:** Starting materials were purchased from Sigma-Aldrich<sup>®</sup> and used without further purification. Solvents were purified by standard procedures.<sup>1</sup>

**Analytical Methods:** The reaction outcomes were analyzed by Merck<sup>®</sup> Thin Layer Chromatography Silica Gel 60 F<sub>254</sub>, visualized with UV light and revealed with vanillin solution in H<sub>2</sub>SO<sub>4(aq)</sub> followed by heating. Conversions were analyzed by GC-FID, GC-MS and <sup>1</sup>H NMR analysis. The GC-17A (Shimadzu<sup>®</sup>) chromatograph with flame ionization detector (FID), equipped with Agilent<sup>®</sup> HP-5 capillary column was used. The GC-FID conditions were: injector = 260°C; detector = 280°C; pressure = 100 kPa. The column temperature range was 40 °C to 115 °C at 10 °C/min. GC-MSQP2010SE (Shimadzu<sup>®</sup>) with low-resolution electron impact (EI, 70 eV) chromatograph, equipped with a Restek<sup>®</sup> Rtx-5MS capillary column, was also employed. The GC-MS conditions were: injector = 260°C; detector = 280°C; pressure = 100 kPa. The column temperature range was 40 °C to 115 °C at 10 °C/min and hold time = 15 min). Varian<sup>®</sup> INOVA (300 MHz) and Bruker<sup>®</sup> Avance III (300 MHz) spectrometers were used in the NMR characterizations. The chemical shifts of <sup>1</sup>H and <sup>13</sup>C NMR spectra were referenced either to tetramethylsilane as internal standard (<sup>1</sup>H NMR: CDCl<sub>3</sub> at δ 7.26 ppm and acetone-d<sub>6</sub> at δ 2.05 ppm) or deuterated solvent (<sup>13</sup>C NMR = CDCl<sub>3</sub> at δ 77.16 ppm and acetone-d<sub>6</sub> at δ 29.92 ppm and δ 206.25 ppm). High-resolution mass spectra were obtained on a Bruker<sup>®</sup> Daltonics MicroToF spectrometer using electrospray ionization–time of flight (ESI-TOF) techniques. The melting points were determined with a BÜCHI<sup>®</sup> B-545 apparatus. Scanning Electron Microscopy (SEM) images were obtained using a JEOL<sup>®</sup> JSM 7401F field emission gun electron microscope. Samples were prepared by the conductive double-sided carbon tape technique. All experiments described in this study were carried out at least in sextuplicate.

## Synthesis and Characterization of the Benzoic Acid Resin (BAR)

Scheme S1

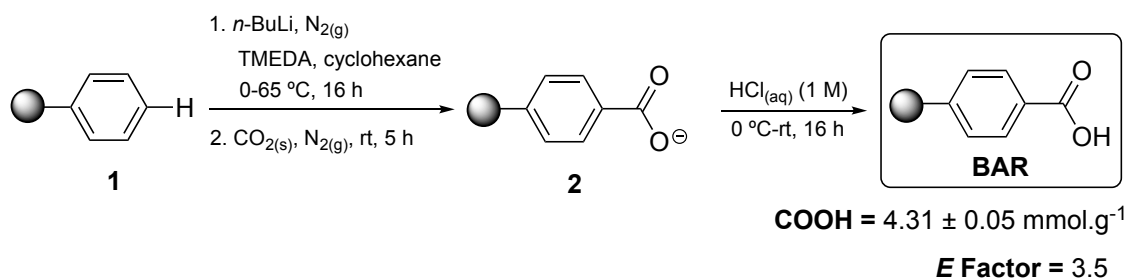

Considering solvent recycle, the *E* Factor value was calculated as follows: Obtained mass of **BAR** = 2.49 g; Mass of reagents = 9.25 g (1.97 g of TMEDA + 1.54 g of *n*-BuLi + 3.00 g of  $\text{CO}_2(\text{s})$  + 2.74 g of HCl); Amount of poly(styrene-co-divinylbenzene) **1** = 2.00 g.

$$E \text{ Factor} = (2.00 + 9.25 - 2.49)/2.49 = 3.5$$

Resin **1** and **BAR** were also characterized by SEM (Figure S1).

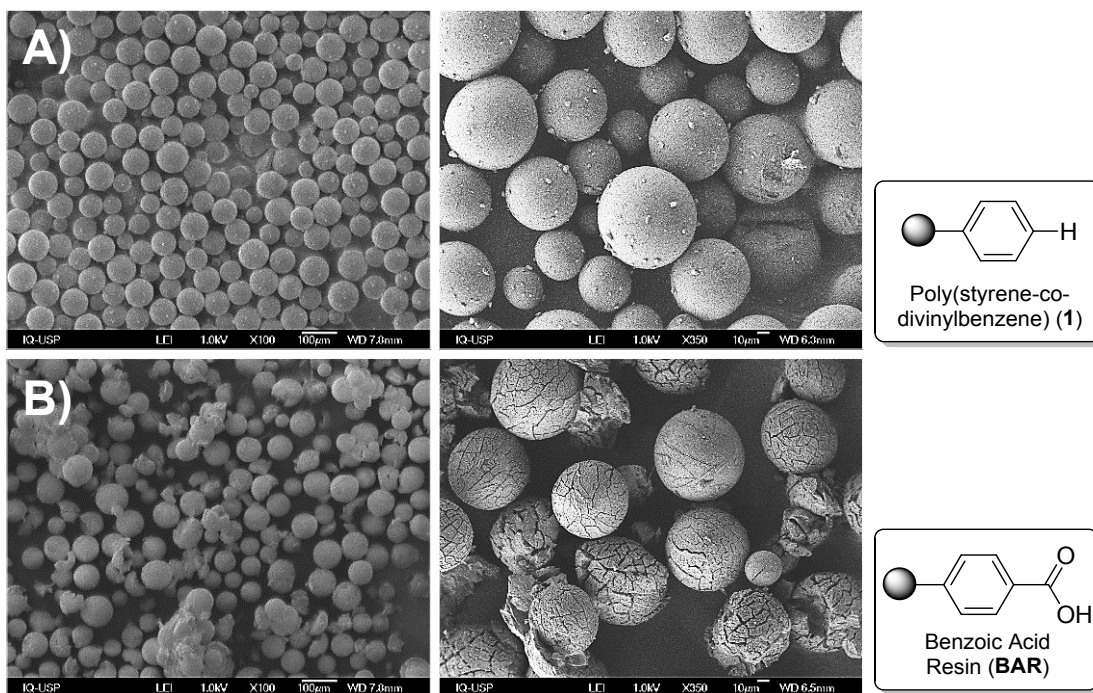

Figure S1: SEM images of **1** (A) and **BAR** (B) at x100 and x350 magnifications.

## Assembly for Continuous Flow Oxidations of $\beta$ -O-4 Lignin Models Mediated by BAR

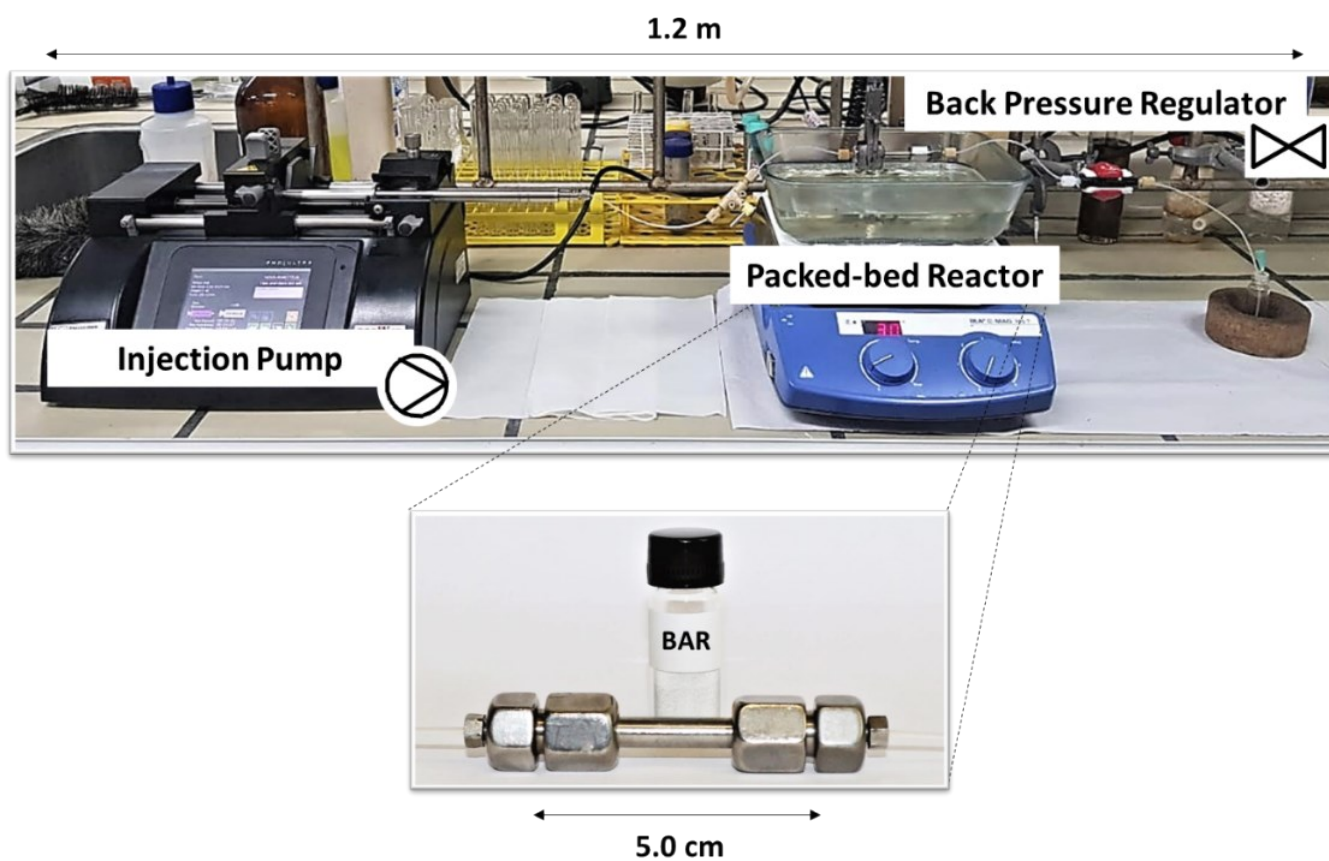

**Figure S2:** Assembly for the continuous flow system mediated by **BAR**.

## Synthesis of the $\beta$ -O-4 Lignin Models

The synthesis and characterization of the ether-substituted  $\alpha$ -phenoxyacetophenones (**iii<sub>a-e</sub>**) from ether-substituted acetophenones (**i<sub>a-c</sub>**) was published by our group (Scheme S2).<sup>2</sup>

Scheme S2<sup>2</sup>

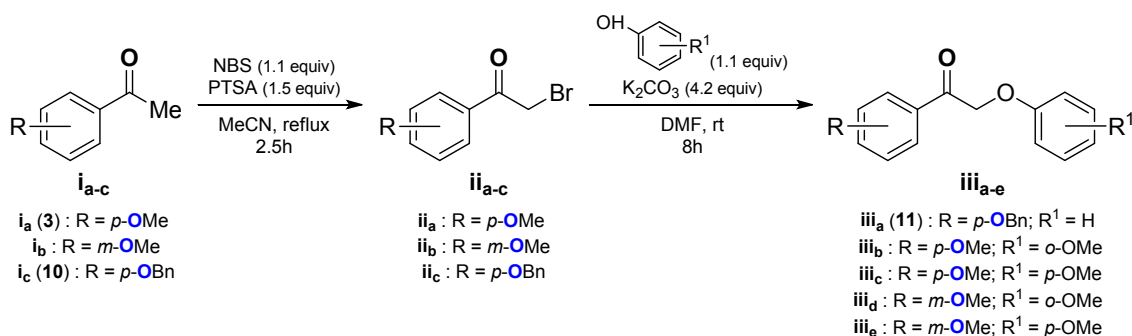

**1-(4-(benzyloxy)phenyl)ethanone (i<sub>c</sub>, 10)**: white powder.

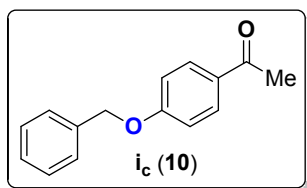

<sup>1</sup>H NMR (300 MHz, CDCl<sub>3</sub>):  $\delta$  = 7.94 (d, *J* = 8.8 Hz, 2H), 7.44–7.34 (m, 5H), 7.00 (d, *J* = 8.8 Hz, 2H), 5.14 (s, 2H), 2.55 (s, 3H) ppm.

<sup>13</sup>C NMR (75 MHz, CDCl<sub>3</sub>):  $\delta$  = 196.9, 162.8, 136.2, 130.7 (2C), 128.8 (2C), 128.4, 127.6 (2C), 114.7 (2C), 70.3, 26.5

ppm.

**mp** (°C): 90-91 (lit.<sup>4</sup> 89-90).

**R<sub>f</sub>**: 0.72 (3:7 EtOAc/hexanes).

**#CAS**: 54696-05-8.

**1-(4-(benzyloxy)phenyl)-2-phenoxyethanone (iii<sub>a</sub>, 11)**: beige solid.

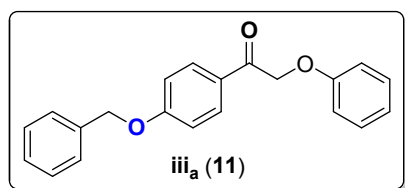

<sup>1</sup>H NMR (300 MHz, CDCl<sub>3</sub>):  $\delta$  = 7.99 (d, *J* = 8.9 Hz, 2H), 7.42–7.25 (m, 7H), 7.04–6.92 (m, 5H), 5.19 (s, 2H), 5.13 (s, 2H) ppm.

<sup>13</sup>C NMR (75 MHz, CDCl<sub>3</sub>):  $\delta$  = 193.2, 163.3, 158.2, 136.1, 130.7 (2C), 129.7 (2C), 128.8 (2C), 128.4,

127.9, 127.6 (2C), 121.7, 115.0 (2C), 114.9 (2C), 70.8, 70.3 ppm.

**mp** (°C): 111-112.

**R<sub>f</sub>**: 0.66 (3:7 CH<sub>2</sub>Cl<sub>2</sub>/hexanes).

**#CAS**: 2173138-44-6.

For the synthesis of the ether-substituted  $\alpha,\alpha$ -(hydroxymethyl)phenoxyacetophenones **12-16**, a slightly modified procedure for the aldol addition between formaldehyde (HCHO) and **iii<sub>a-e</sub>** (Scheme S3), previously described for Magallanes *et al.*<sup>3</sup>, was employed.

Scheme S3<sup>3</sup>

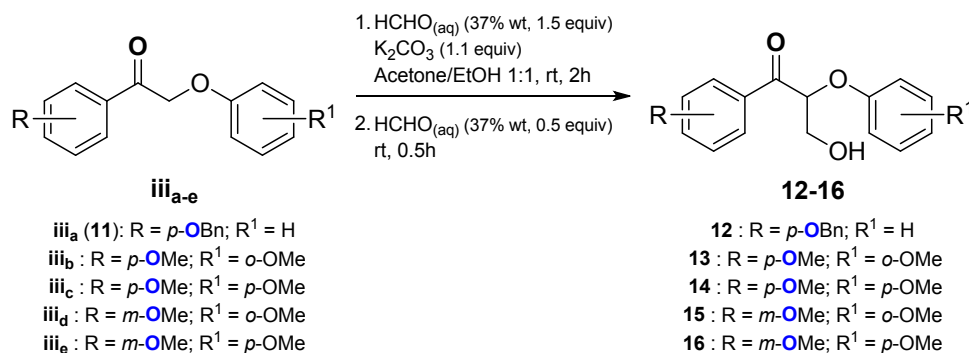

Substrates **iii<sub>a-e</sub>** (7.00 mmol) were solubilized in 50 mL of a mixture of acetone and ethanol (1:1). Potassium carbonate (1.06 g, 7.70 mmol) was added and the reaction mixture was left stirring for 5 minutes. Then, formalin (aqueous, 37% wt, 830  $\mu$ L, 10.5 mmol) was added, stirred for 2 h at room temperature. The reaction mixture was analyzed by TLC. Due to the presence of starting material, formalin (37% wt, 275  $\mu$ L, 3.50 mmol) was added once again. After 30 min, the solvent was evaporated under reduced pressure, and water (50 mL) and CHCl<sub>3</sub> (50 mL) were added to the flask. The aqueous layer was washed with CHCl<sub>3</sub> (3 x 25 mL). The combined organic layers were washed with water, brine, and then dried over anhydrous MgSO<sub>4</sub>. The organic layer was concentrated and purified by column chromatography (EtOAc/hexanes).

**1-(4-(benzyloxy)phenyl)-3-hydroxy-2-phenoxypropan-1-one (12)**: yield = 91% (2.20 g), pearl-white solid.

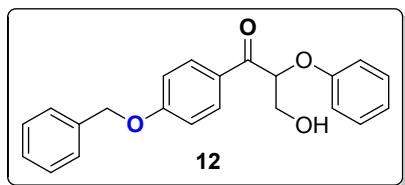

<sup>1</sup>H NMR (300 MHz, CDCl<sub>3</sub>):  $\delta$  = 8.05 (d, *J* = 5.4 Hz, 2H), 7.41–7.35 (m, 5H), 7.24 (dd, *J* = 4.5 Hz, *J* = 5.4 Hz, 2H), 7.01 (d, *J* = 5.4 Hz, 2H), 6.96 (t, *J* = 4.5 Hz, 1H), 6.89 (d, *J* = 4.5 Hz, 2H), 5.49 (dd, *J* = 2.4 Hz, *J* = 3.9 Hz, 1H), 5.13 (s, 1H), 4.17–4.07 (m, 2H), 2.38 (dd, *J* = 3.6 Hz, *J* = 4.5 Hz, 1H) ppm.  
<sup>13</sup>C NMR (75 MHz, CDCl<sub>3</sub>):  $\delta$  = 195.1, 163.5, 157.4, 136.1, 131.4 (2C), 129.8 (2C), 128.9 (2C), 128.5, 128.0, 127.6 (2C), 122.0, 115.4 (2C), 115.1 (2C), 81.2, 70.4, 63.5 ppm.

mp (°C): 107-109.

*R<sub>f</sub>*: 0.41 (5:5 AcOEt/hexanes).

HRMS (ESI-TOF): *m/z* [M + H]<sup>+</sup> calc. for C<sub>22</sub>H<sub>21</sub>O<sub>4</sub>: 349.1440, found: 349.1433.

#CAS: 2183492-22-8.

**3-hydroxy-2-(2-methoxyphenoxy)-1-(4-methoxyphenyl)propan-1-one (13):** yield = 83% (1.76 g), pale-yellow syrup.

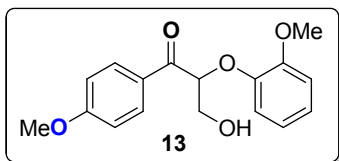

**<sup>1</sup>H NMR (300 MHz, acetone-*d*<sub>6</sub>):**  $\delta$  = 8.15 (d, *J* = 8.8 Hz, 2H), 7.08–6.76 (m, 6H), 5.51 (t, *J* = 5.6 Hz, 1H), 4.07–4.045.13 (m, 2H), 3.90 (s, 3H), 3.79 (s, 3H), 2.82–2.79 (m, 1H) ppm.

**<sup>13</sup>C NMR (75 MHz, acetone-*d*<sub>6</sub>):**  $\delta$  = 196.1, 164.8, 151.3, 148.6, 132.1 (2C), 129.7, 123.3, 121.7, 117.5, 114.7 (2C), 113.9, 84.3, 64.1, 56.3, 56.0 ppm.

***R*<sub>f</sub>:** 0.39 (4:6 AcOEt/hexanes).

**HRMS (ESI-TOF):** *m/z* [M + H]<sup>+</sup> calc. for C<sub>17</sub>H<sub>19</sub>O<sub>5</sub>: 303.1233, found: 303.1231.

#CAS: 92409-23-9.

**3-hydroxy-2-(4-methoxyphenoxy)-1-(4-methoxyphenyl)propan-1-one (14):** yield = 87% (1.84 g), colorless crystals.

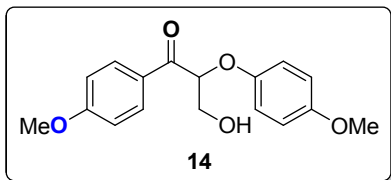

**<sup>1</sup>H NMR (300 MHz, acetone-*d*<sub>6</sub>):**  $\delta$  = 8.13 (d, *J* = 8.8 Hz, 2H), 7.06 (d, *J* = 8.8 Hz, 2H), 6.96 (d, *J* = 5.4 Hz, 2H), 6.89 (d, *J* = 5.4 Hz, 2H), 5.48 (d, *J* = 5.5 Hz, 1H), 4.23 (dd, *J* = 5.5 Hz, *J* = 5.5 Hz, 2H), 3.96 (s, 3H), 3.80

(s, 3H), 2.85 (bs, 1H) ppm.

**<sup>13</sup>C NMR (75 MHz, acetone-*d*<sub>6</sub>):**  $\delta$  = 196.3, 164.9, 155.3, 153.0, 132.0 (2C), 129.5, 117.3 (2C), 115.4 (2C), 114.8 (2C), 83.6, 64.0, 56.1, 55.8 ppm.

**mp (°C):** 94-96 (lit.<sup>5</sup> 93-96).

***R*<sub>f</sub>:** 0.34 (4:6 AcOEt/hexanes).

**HRMS (ESI-TOF):** *m/z* [M + H]<sup>+</sup> calc. for C<sub>17</sub>H<sub>19</sub>O<sub>5</sub>: 303.1233, found: 303.1239.

#CAS: 2093366-73-3.

**3-hydroxy-2-(2-methoxyphenoxy)-1-(3-methoxyphenyl)propan-1-one (15):** yield = 90% (1.90 g), non-crystalline beige solid.

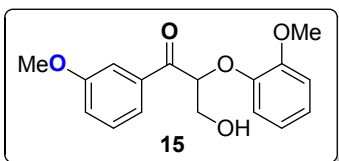

**<sup>1</sup>H NMR (300 MHz, acetone-*d*<sub>6</sub>):**  $\delta$  = 7.72 (ddd, *J* = 1.2 Hz, *J* = 0.9 Hz, *J* = 1.5 Hz, *J* = 7.6 Hz, 1H), 7.63 (dd, *J* = 1.5 Hz, *J* = 2.7 Hz, 1H), 7.43 (t, *J* = 8.1 Hz, 1H), 7.19 (ddd, *J* = 0.9 Hz, *J* = 0.9 Hz, *J* = 2.7 Hz, *J* = 8.1 Hz, 1H), 6.96–6.89 (m, 3H), 6.82–6.79 (m, 1H), 5.59–5.56 (m, 1H), 4.09–4.05 (m, 2H), 3.85 (s, 3H), 3.77 (s, 3H), 2.81 (bs, 1H) ppm.

**<sup>13</sup>C NMR (75 MHz, acetone-*d*<sub>6</sub>):**  $\delta$  = 197.6, 160.8, 151.2, 148.5, 138.1, 130.6, 123.4, 122.0, 121.6, 120.3, 117.6, 114.2, 113.8, 84.2, 64.0, 56.2, 55.8 ppm.

***R*<sub>f</sub>:** 0.40 (4:6 AcOEt/hexanes).

**HRMS (ESI-TOF):** *m/z* [M + H]<sup>+</sup> calc. for C<sub>17</sub>H<sub>19</sub>O<sub>5</sub>: 303.1233, found: 303.1245.

#CAS: 20730-76-1.

**3-hydroxy-2-(4-methoxyphenoxy)-1-(3-methoxyphenyl)propan-1-one (16):** yield = 86% (1.82 g), white powder.

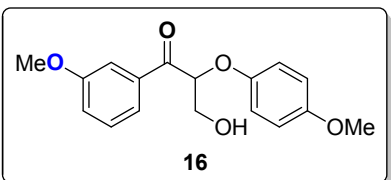

**<sup>1</sup>H NMR (300 MHz, acetone-*d*<sub>6</sub>):**  $\delta$  = 7.65 (ddd, *J* = 1.1 Hz, *J* = 0.9 Hz, *J* = 1.5 Hz, *J* = 7.7 Hz, 1H), 7.55 (dd, *J*

= 1.5 Hz,  $J = 2.7$  Hz, 1H), 7.47 (t,  $J = 8.0$  Hz, 1H), 7.23 (ddd,  $J = 0.9$  Hz,  $J = 1.1$  Hz,  $J = 2.7$  Hz,  $J = 7.9$  Hz, 1H), 6.94–6.83 (m, 4H), 5.64 (t,  $J = 5.4$  Hz, 1H), 4.15–4.10 (m, 2H), 3.87 (s, 3H), 3.73 (s, 3H), 2.85 (bs, 1H) ppm.

**$^{13}\text{C}$  NMR (75 MHz, acetone- $\text{d}_6$ ):**  $\delta = 197.4, 160.9, 155.3, 153.0, 137.9, 130.4, 123.6, 120.0, 117.8, 115.1$  (2C), 114.6 (2C), 84.5, 64.1, 55.9, 55.7 ppm.

**mp ( $^{\circ}\text{C}$ ):** 90-93.

**$R_f$ :** 0.42 (4:6 AcOEt/hexanes).

**HRMS (ESI-TOF):**  $m/z$   $[\text{M} + \text{H}]^+$  calc. for  $\text{C}_{17}\text{H}_{19}\text{O}_5$ : 303.1233, found: 303.1247.



## NMR data for the Products (Table 3, Scheme S4)

Scheme S4

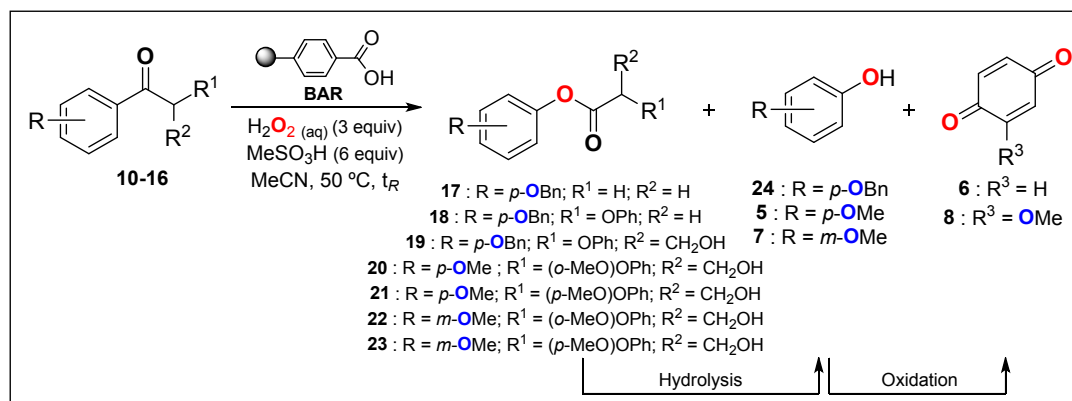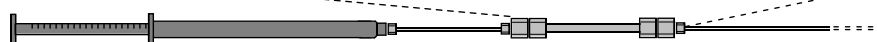

**4-(benzyloxy)phenyl acetate (17)**: yield for Entry 1, Table 3 = 16% (34.2 mg, 0.14 mmol), colorless crystals.

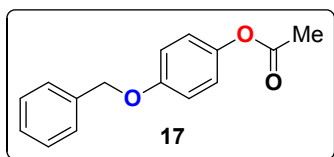

<sup>1</sup>H NMR (300 MHz, CDCl<sub>3</sub>): δ = 7.44–7.34 (m, 4H), 7.31 (ddd, *J* = 1.5 Hz, *J* = 1.5 Hz, *J* = 2.1 Hz, *J* = 9.0 Hz, 1H), 7.02–6.94 (m, 4H), 5.04 (s, 2H), 2.28 (s, 3H) ppm.

<sup>13</sup>C NMR (75 MHz, CDCl<sub>3</sub>): δ = 170.0, 156.7, 144.6, 137.0, 128.8 (2C), 128.2, 127.6 (2C), 122.5 (2C), 115.6 (2C), 70.6, 21.2 ppm.

mp (°C): 111–112 (lit.<sup>6</sup> 100–111).

*R<sub>f</sub>*: 0.67 (5:5 AcOEt/hexanes).

HRMS (ESI-TOF): *m/z* [M + H]<sup>+</sup> calc. for C<sub>15</sub>H<sub>15</sub>O<sub>3</sub>: 243.1021, found: 243.1015.

#CAS: 6311-66-6.

**1,4-benzoquinone (6)**: yield for Entry 6, Table 3 = 89% (56.2 mg, 0.52 mmol), neon-yellow crystals.

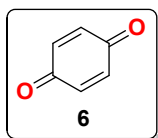

<sup>1</sup>H NMR (300 MHz, CDCl<sub>3</sub>): δ = 6.79 (s, 4H) ppm.

<sup>13</sup>C NMR (75 MHz, CDCl<sub>3</sub>): δ = 187.1 (2C), 136.4 (4C) ppm.

mp (°C): 112–115 (lit.<sup>7</sup> 115–116).

*R<sub>f</sub>*: 0.91 (6:4 AcOEt/hexanes).

MS (EI<sup>+</sup>): *m/z* (relative intensity) 108 (M<sup>+</sup>, 89), 54 (100).

#CAS: 106-51-4.

**4-(benzyloxy)phenyl 2-phenoxyacetate (18)**: yield for Entry 3, Table 3 = 22% (64.8 mg, 0.19 mmol), pale-yellow solid.

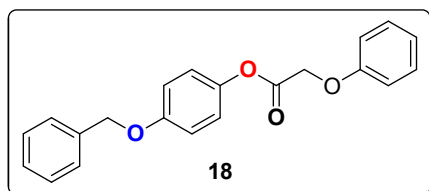

<sup>1</sup>H NMR (300 MHz, CDCl<sub>3</sub>): δ = 7.43–7.30 (m, 7H), 7.04–6.94 (m, 7H), 5.05 (s, 2H), 5.13 (s, 2H), 4.86 (s, 2H) ppm.

<sup>13</sup>C NMR (75 MHz, CDCl<sub>3</sub>): δ = 168.0, 157.9, 156.8, 143.9, 136.8, 129.8 (2C), 128.8 (2C), 128.2,

127.6 (2C), 122.2 (2C), 122.1, 115.7 (2C), 114.9 (2C), 70.6, 65.6 ppm.

**mp** (°C): 124-127.

**R<sub>f</sub>**: 0.59 (5:5 AcOEt/hexanes).

**HRMS (ESI-TOF)**: *m/z* [M + Na]<sup>+</sup> calc. for C<sub>21</sub>H<sub>18</sub>O<sub>4</sub>Na: 357.1103, found: 357.1099.

**#CAS**: 686311-24-0.

**4-(benzyloxy)phenyl 3-hydroxy-2-phenoxypropanoate (19)**: yield for Entry 5, Table 3 = 8% (16.7 mg, 0.04 mmol), beige solid.

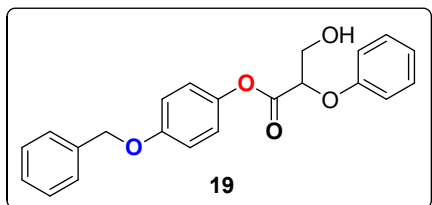

**<sup>1</sup>H NMR (300 MHz, CDCl<sub>3</sub>)**: δ = 7.42–7.22 (m, 7H), 7.0–6.88 (m, 7H), 5.10 (s, 2H), 4.95 (dd, *J* = 5.7 Hz, *J* = 5.8 Hz, 1H), 4.22–4.16 (m, 2H), 2.33 (bs, 1H) ppm.

**<sup>13</sup>C NMR (75 MHz, CDCl<sub>3</sub>)**: δ = 168.9, 158.1, 156.9, 144.5, 135.1 (2C), 130.0 (2C), 128.3, 127.7 (2C), 122.5, 122.4 (2C), 115.8 (2C), 115.0 (2C), 89.5, 70.5, 63.4 ppm.

**mp** (°C): 137-139.

**R<sub>f</sub>**: 0.62 (6:4 AcOEt/hexanes).

**HRMS (ESI-TOF)**: *m/z* [M + Na]<sup>+</sup> calc. for C<sub>22</sub>H<sub>20</sub>O<sub>5</sub>Na: 387.1209, found: 387.1218.

**4-benzyloxyphenol (24)**: Table 3, conjoined traces (8.5 mg),

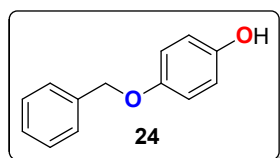

white powder.

**<sup>1</sup>H NMR (300 MHz, CDCl<sub>3</sub>)**: δ = 7.42–7.29 (m, 5H), 6.85 (d, *J* = 5.4 Hz, 2H), 6.75 (d, *J* = 5.4 Hz, 2H), 5.82 (bs, 1H), 4.99 (s, 2H) ppm.

**m.p.** (°C): 120-122 (lit.<sup>6</sup> 121-122).

**R<sub>f</sub>**: 0.12 (6:4 AcOEt/hexanes).

**#CAS**: 103-16-2.

**4-methoxyphenyl 3-hydroxy-2-(2-methoxyphenoxy)propanoate (20)**: yield for Entry 6, Table 3 = 9% (16.5 mg, 0.05 mmol), opaque white crystals.

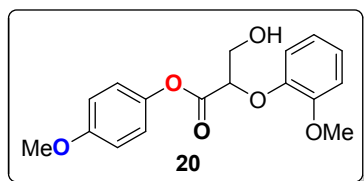

**<sup>1</sup>H NMR (300 MHz, CDCl<sub>3</sub>)**: δ = 7.26–6.76 (m, 8H), 4.88 (dd, *J* = 3.9 Hz, *J* = 6.3 Hz, 1H), 4.19 (ddd, *J* = 6.3 Hz, *J* = 3.9 Hz, *J* = 11.7 Hz, *J* = 26.1 Hz, 2H), 3.86 (s, 3H), 3.75

(s, 3H), 3.30 (bs, 1H) ppm.

**<sup>13</sup>C NMR (75 MHz, CDCl<sub>3</sub>)**: δ = 168.6, 150.1, 147.4, 143.8, 143.3, 123.1, 122.0 (2C), 120.9, 115.6, 114.9 (2C), 112.6, 81.0, 67.3, 56.0, 55.6 ppm.

**mp** (°C): 146-149.

**R<sub>f</sub>**: 0.70 (6:4 AcOEt/hexanes).

**HRMS (ESI-TOF)**: *m/z* [M + H]<sup>+</sup> calc. for C<sub>17</sub>H<sub>19</sub>O<sub>6</sub>: 319.1182, found: 319.1190.

**4-methoxyphenol (5)**: Table 3, conjoined traces (6.5 mg), off white powder.

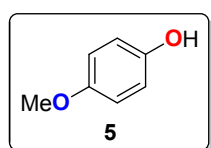

**<sup>1</sup>H NMR (300 MHz, CDCl<sub>3</sub>)**: δ = 6.81–6.75 (m, 4H), 4.60 (bs, 1H), 3.76 (s, 3H) ppm.

**mp** (°C): 56-57 (lit.<sup>8</sup> 54-56).

$R_f$ : 0.16 (6:4 AcOEt/hexanes).

#CAS: 150-76-5.

**4-methoxyphenyl 3-hydroxy-2-(4-methoxyphenoxy)propanoate (21)**: yield for Entry

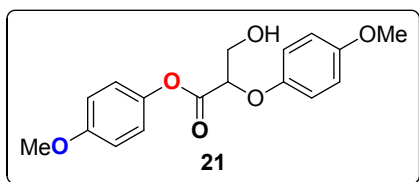

7, Table 3 = 8% (14.6 mg, 0.05 mmol), white powder.

$^1\text{H NMR}$  (300 MHz,  $\text{CDCl}_3$ ):  $\delta$  = 7.02 (d,  $J$  = 9.0 Hz, 2H), 6.95–6.82 (m, 6H), 4.89 (dd,  $J$  = 4.5 Hz,  $J$  = 5.1 Hz, 1H), 4.22 (ddd,  $J$  = 5.1 Hz,  $J$  = 4.5 Hz,  $J$  = 12.0 Hz,  $J$  = 14.1 Hz, 2H), 5.13 (s, 2H), 3.76 (s, 6H), 2.70

(bs, 1H) ppm.

$^{13}\text{C NMR}$  (75 MHz,  $\text{CDCl}_3$ ):  $\delta$  = 168.9, 157.7, 155.2, 151.6, 143.8, 122.2 (2C), 117.2 (2C), 114.9 (2C), 114.6 (2C), 79.1, 63.6, 55.7, 55.6 ppm.

mp ( $^\circ\text{C}$ ): 150-152.

$R_f$ : 0.72 (6:4 AcOEt/hexanes).

HRMS (ESI-TOF):  $m/z$  [ $\text{M} + \text{H}$ ] $^+$  calc. for  $\text{C}_{17}\text{H}_{19}\text{O}_6$ : 319.1182, found: 319.1196.

**3-methoxyphenyl 3-hydroxy-2-(2-methoxyphenoxy)propanoate (22)**: yield for Entry

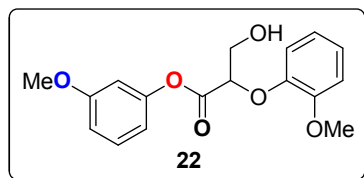

8, Table 3 = 11% (20.0 mg, 0.06 mmol), yellow oil.

$^1\text{H NMR}$  (300 MHz,  $\text{CDCl}_3$ ):  $\delta$  = 7.21 (t,  $J$  = 5.6 Hz, 1H), 7.01–6.77 (m, 7H), 4.89 (dd,  $J$  = 3.9 Hz,  $J$  = 6.3 Hz, 1H), 4.08 (ddd,  $J$  = 6.3 Hz,  $J$  = 3.9 Hz,  $J$  = 11.7 Hz,  $J$  = 27.3 Hz, 2H), 3.87 (s, 3H), 3.84 (s, 3H), 3.16 (bs, 1H) ppm.

$^{13}\text{C NMR}$  (75 MHz,  $\text{CDCl}_3$ ):  $\delta$  = 169.1, 160.4, 151.9, 147.2, 143.6, 130.0, 123.2, 120.6, 116.0, 114.2, 112.7, 111.3, 107.5, 83.0, 68.1, 56.0, 55.6 ppm.

$R_f$ : 0.75 (6:4 AcOEt/hexanes).

HRMS (ESI-TOF):  $m/z$  [ $\text{M} + \text{H}$ ] $^+$  calc. for  $\text{C}_{17}\text{H}_{19}\text{O}_6$ : 319.1182, found: 319.1177.

**3-methoxyphenol (7)**: Table 3, conjoined traces (6.2 mg), deep-brown liquid.

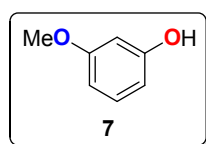

$^1\text{H NMR}$  (300 MHz,  $\text{CDCl}_3$ ):  $\delta$  = 7.14 (t,  $J$  = 5.8 Hz, 1H), 6.54–6.44 (m, 3H), 5.56 (bs, 1H), 3.78 (s, 3H) ppm.

$R_f$ : 0.15 (6:4 AcOEt/hexanes).

#CAS: 150-19-6.

**2-methoxycyclohexa-2,5-diene-1,4-dione (8)**: yield for Entry 8, Table 3 = 84% (56.2 mg, 0.52 mmol), beige powder.

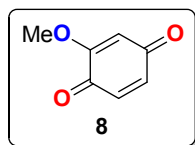

$^1\text{H NMR}$  (300 MHz,  $\text{CDCl}_3$ ):  $\delta$  = 6.71 (m, 2H), 5.95 (m, 1H), 3.74 (s, 3H) ppm.

$^{13}\text{C NMR}$  (75 MHz,  $\text{CDCl}_3$ ):  $\delta$  = 187.4, 181.5, 158.6, 137.0, 134.3, 107.5, 56.2 ppm.

mp ( $^\circ\text{C}$ ): 144-145 (lit.<sup>9</sup> 144-146).

$R_f$ : 0.88 (6:4 AcOEt/hexanes).

MS ( $\text{EI}^+$ ):  $m/z$  (relative intensity) 138 ( $\text{M}^+$ , 53), 108 (68), 69 (100).

#CAS: 2880-58-2.

**3-methoxyphenyl 3-hydroxy-2-(4-methoxyphenoxy)propanoate (23)**: yield for Entry 9, Table 3 = 10% (18.4 mg, 0.06 mmol), pale-yellow non-crystalline solid.

**<sup>1</sup>H NMR (300 MHz, CDCl<sub>3</sub>):** δ = 7.20 (t, *J* = 5.7 Hz, 1H), 7.00–6.83 (m, 7H), 4.90 (dd, *J* = 4.5 Hz, *J* = 5.1 Hz, 1H), 4.04 (ddd, *J* = 5.1 Hz, *J* = 4.5 Hz, *J* = 11.7 Hz, *J* = 15.0 Hz, 2H), 3.83 (s, 3H), 3.75 (s, 3H), 2.93 (bs, 1H) ppm.

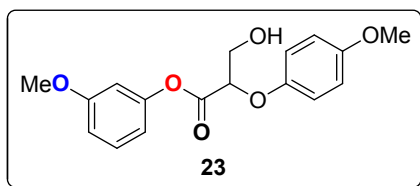

**<sup>13</sup>C NMR (75 MHz, CDCl<sub>3</sub>):** δ = 169.0, 160.2, 152.1, 151.2, 145.9, 129.9, 115.2 (2C), 114.7 (2C), 113.8,

111.7, 107.2, 80.5, 68.0, 55.7, 55.6 ppm.

***R<sub>f</sub>*:** 0.73 (6:4 AcOEt/hexanes).

**HRMS (ESI-TOF):** *m/z* [M + H]<sup>+</sup> calc. for C<sub>17</sub>H<sub>19</sub>O<sub>6</sub>: 319.1182, found: 319.1185.

At the end of this study, after approximately 700 reactions showing the same catalytic activity, **BAR** was unloaded from the packed-bed reactor and analyzed by SEM (Figure S3).

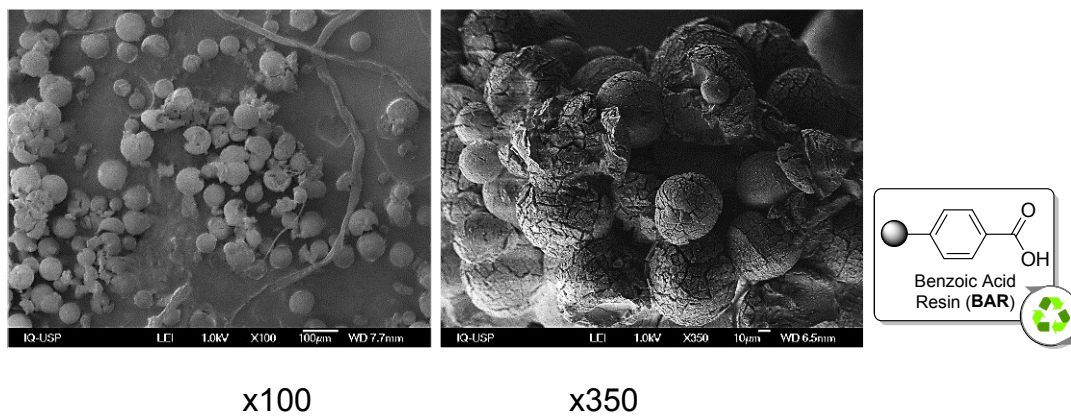

**Figure S3:** SEM images of recycled **BAR** at x100 and x350 magnifications.

Considering solvent recycle, the *E* Factor was calculated as follows: Obtained mass of products = 72.7 mg (56.2 mg of **6** + 16.5 mg of **20**); Mass of reagents = 1008.3 mg (60.7 mg of H<sub>2</sub>O<sub>2</sub> + 342.8 mg of MeSO<sub>3</sub>H + 604.8 mg of NaHCO<sub>3</sub>); Amount of the starting material **13** = 179.7 mg.

$$E \text{ Factor} = (179.7 + 1008.3 - 72.7)/72.7 = 15.3.$$

## Experimental

- [1] D. D. Perrin and W. L. F. Armarego, *Purification of Laboratory Chemicals*, 2nd ed. Oxford: Pergamon Press; 1989.
- [2] W. C. C. Santos, K. A. Dias, L. P. Santos, C. M. Kisukuri, T. S. Rodrigues, R. S. Geonmonond, P. H. C. Camargo and L. H. Andrade, *Adv. Synth. Catal.*, 2018, **360**, 1376–1383.
- [3] G. Magallanes, M. D. Kärkäs, I. Bosque, S. Lee, S. Maldonado and C. R. J. Stephenson, *ACS Catal.*, 2019, **9**, 2252–2260.
- [4] C. -F. Lin, J. -S. Yang, C. -Y. Chang, S. -C. Kuo, M. -R. Lee and L. -J. Huang, *Bioorg. Med. Chem.*, 2005, **13**, 1537–1544.
- [5] A. C. Lindsay, S. Kudo and J. Sperry, *Org. Biomol. Chem.*, 2019, **17**, 7408–7415.
- [6] G. W. K. Cavill and D. H. Solomon, *J. Chem. Soc.*, 1955, 1404–1407.
- [7] A. A. Zagulyaeva, C. T. Banek, M. S. Yusubov and Viktor V. Zhdanki, *Org. Lett.*, 2010, **12**, 4644–4647.
- [8] H. Yang, Y. Li, M. Jiang, J. Wang and H. Fu, *Chem. Eur. J.*, 2011, **17**, 5652–5660.
- [9] F. Derikvand, F. Bigi, R. Maggi, C. G. Piscopo and G. Sartori, *J. Catal.*, 2010, **271**, 99–103.

### NMR Spectra of the $\beta$ -O-4 Lignin Models and Products (Table 3)

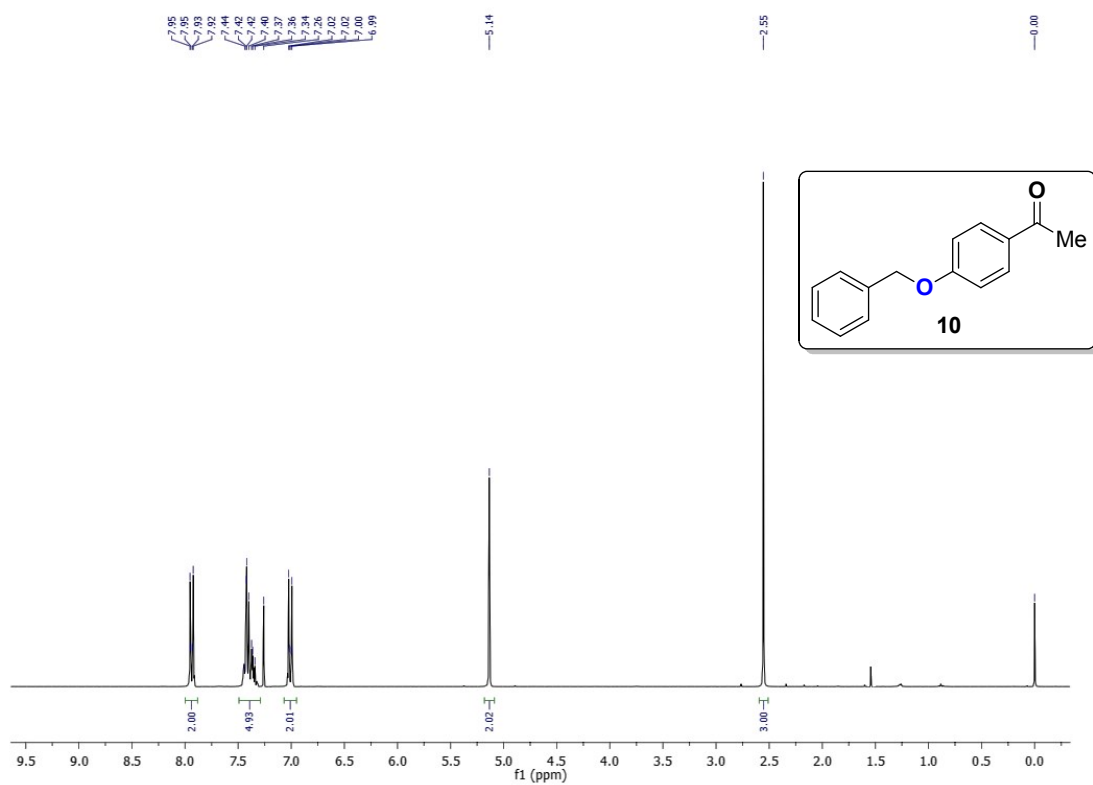

Figure S4.  $^1\text{H}$  NMR Spectrum of **10** (300 MHz,  $\text{CDCl}_3$ ).

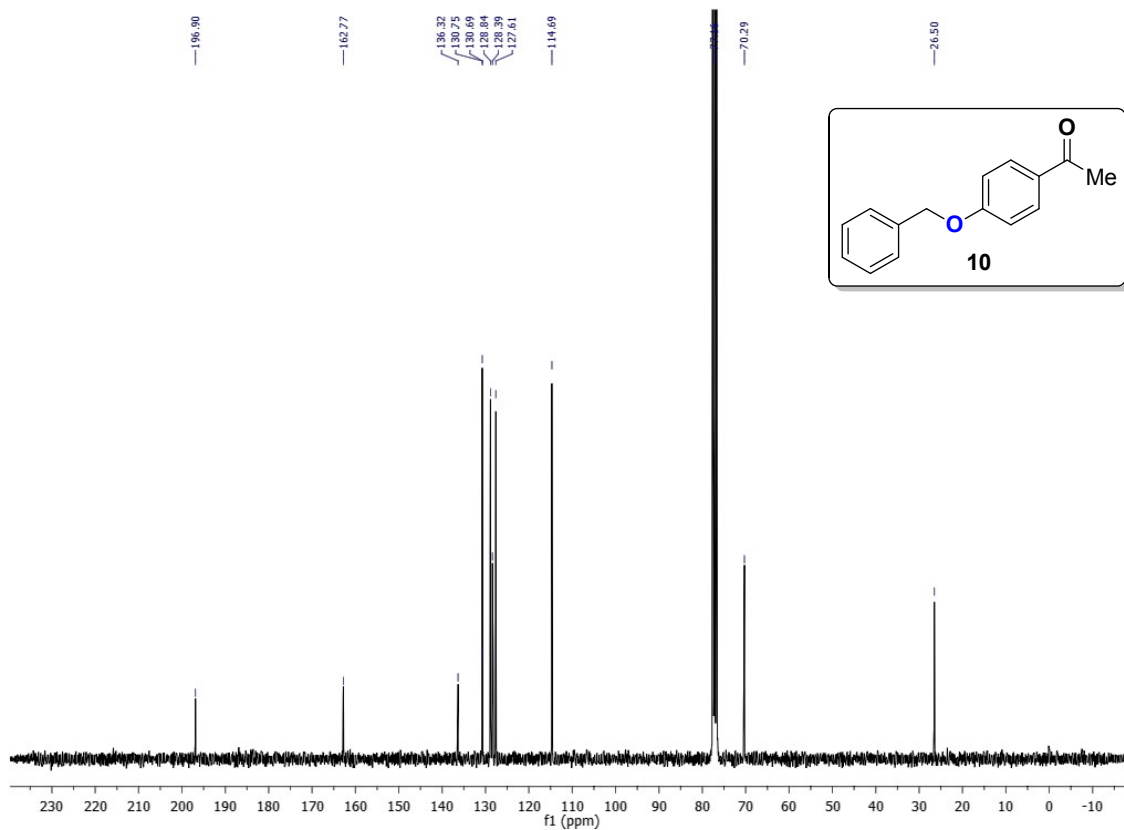

Figure S5.  $^{13}\text{C}$  NMR Spectrum of **10** (75 MHz,  $\text{CDCl}_3$ ).

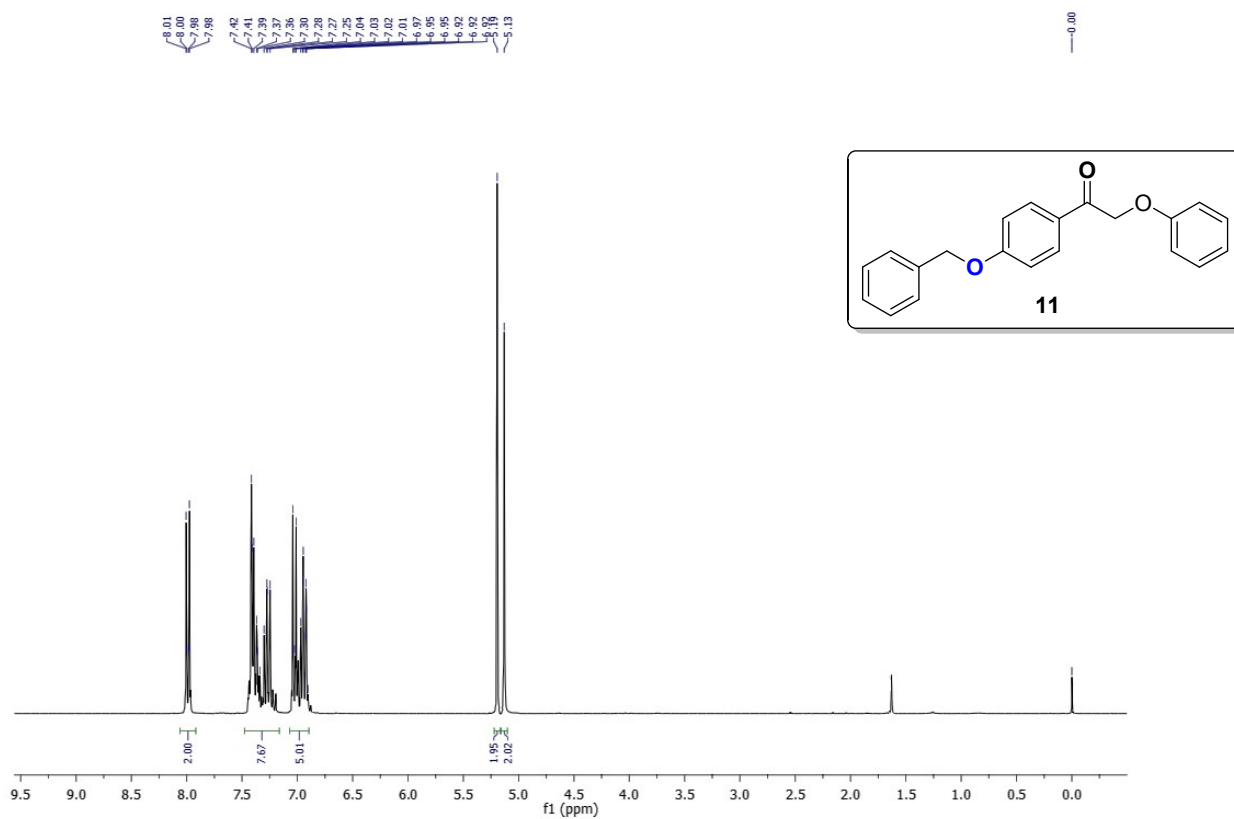

**Figure S6.** <sup>1</sup>H NMR Spectrum of **11** (300 MHz, CDCl<sub>3</sub>).

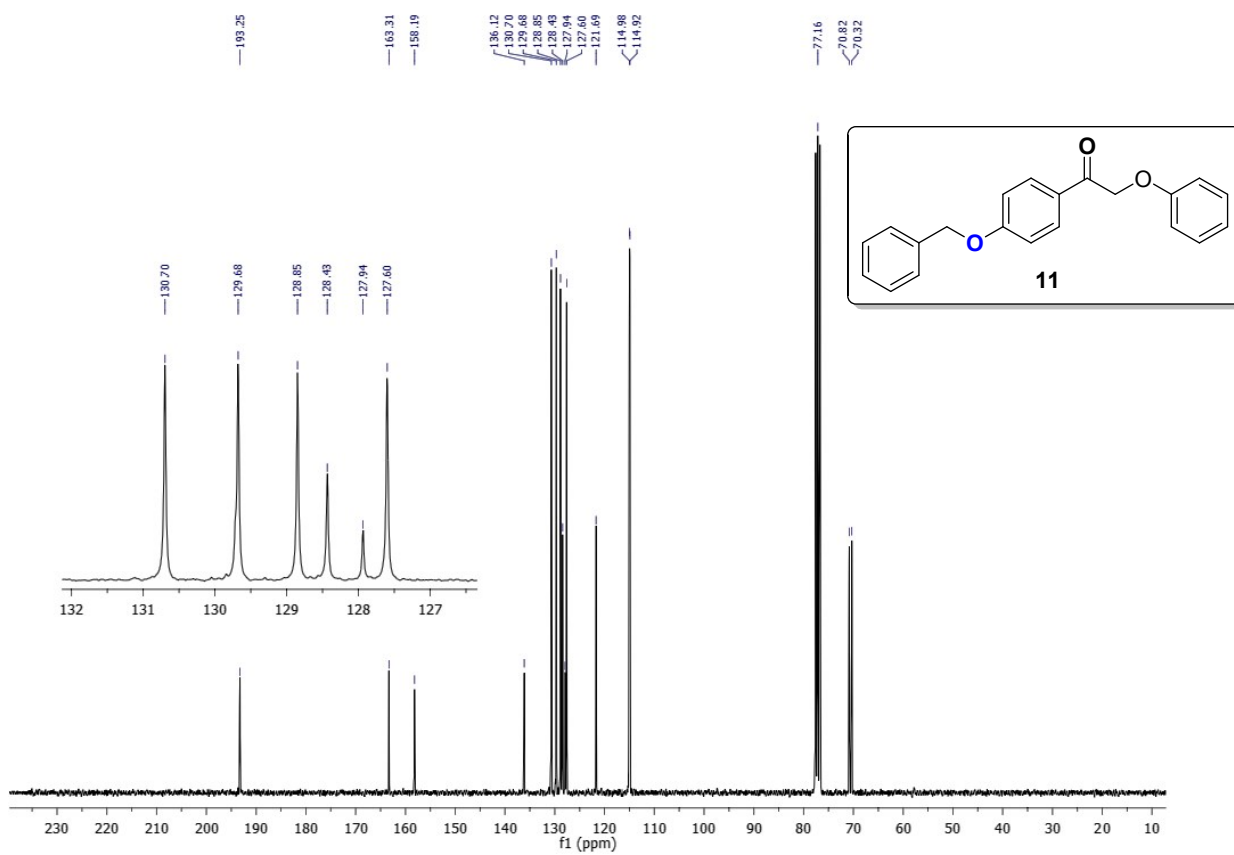

**Figure S7.** <sup>13</sup>C NMR Spectrum of **11** (75 MHz, CDCl<sub>3</sub>).



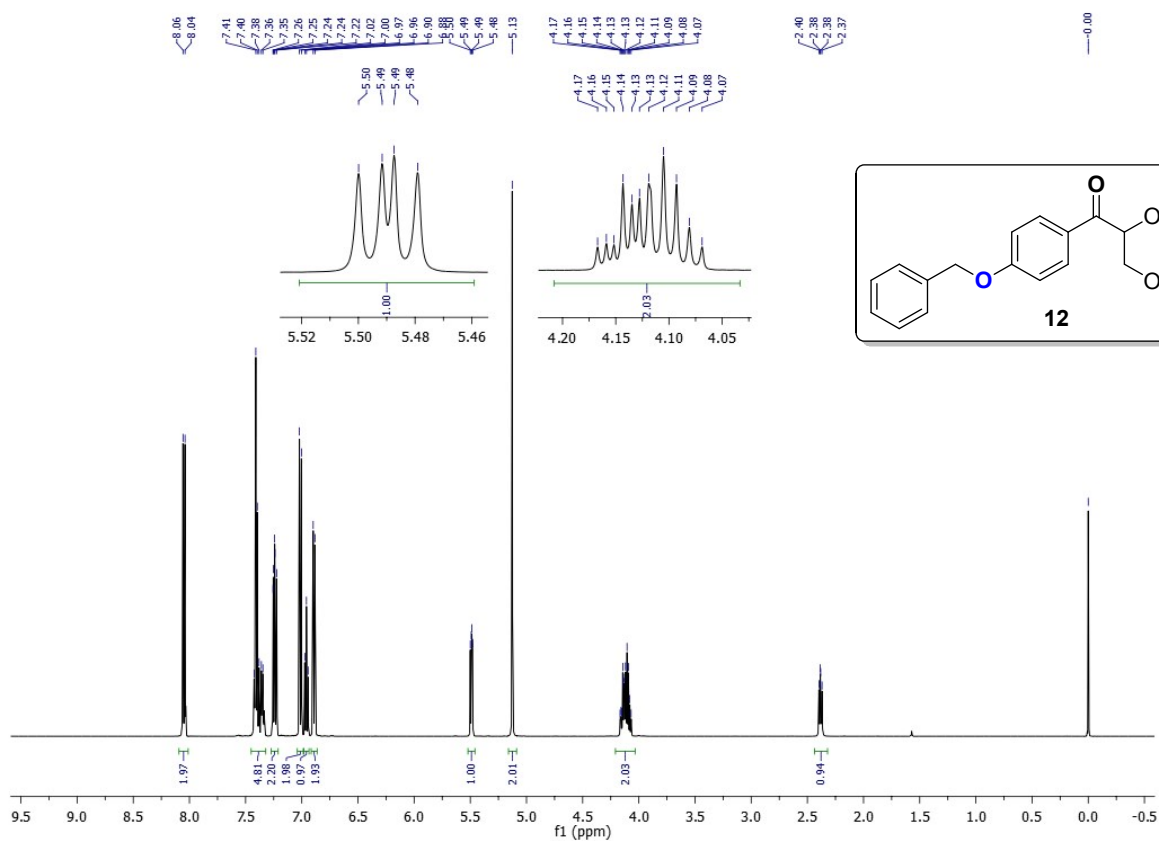

**Figure S8.** <sup>1</sup>H NMR Spectrum of **12** (300 MHz, CDCl<sub>3</sub>).

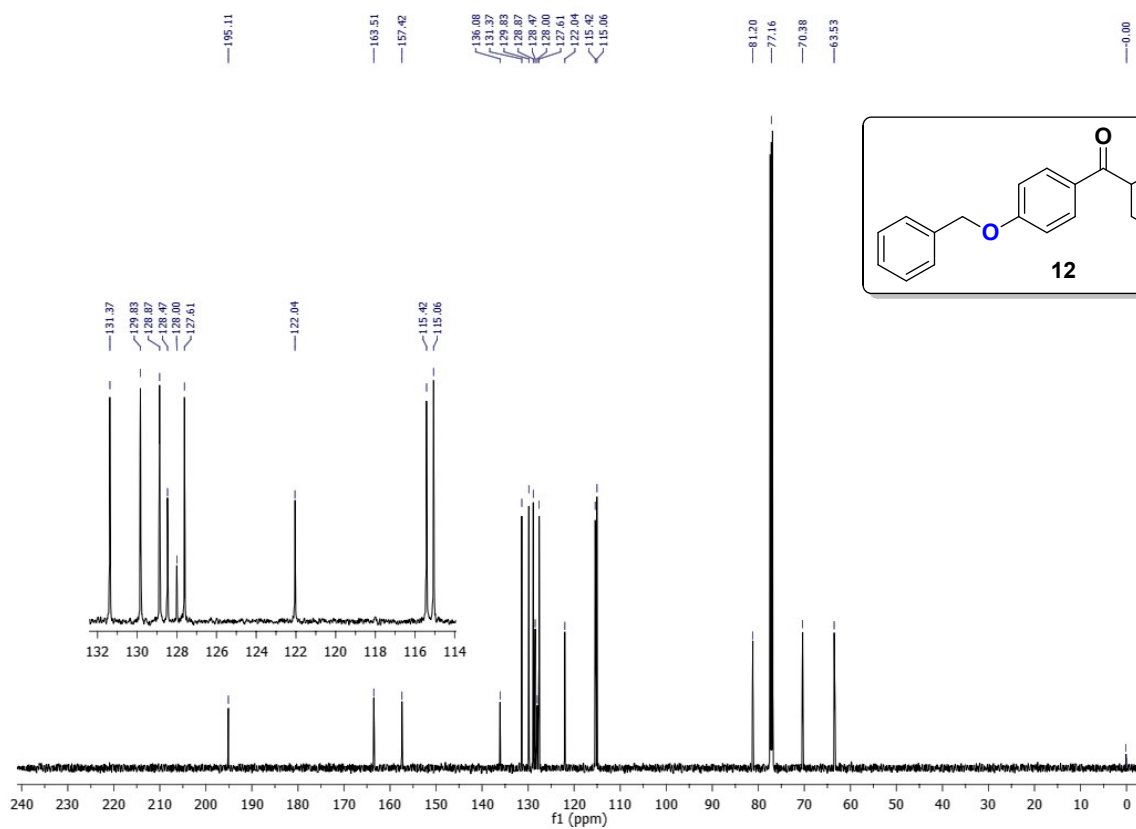

**Figure S9.** <sup>13</sup>C NMR Spectrum of **12** (75 MHz, CDCl<sub>3</sub>).

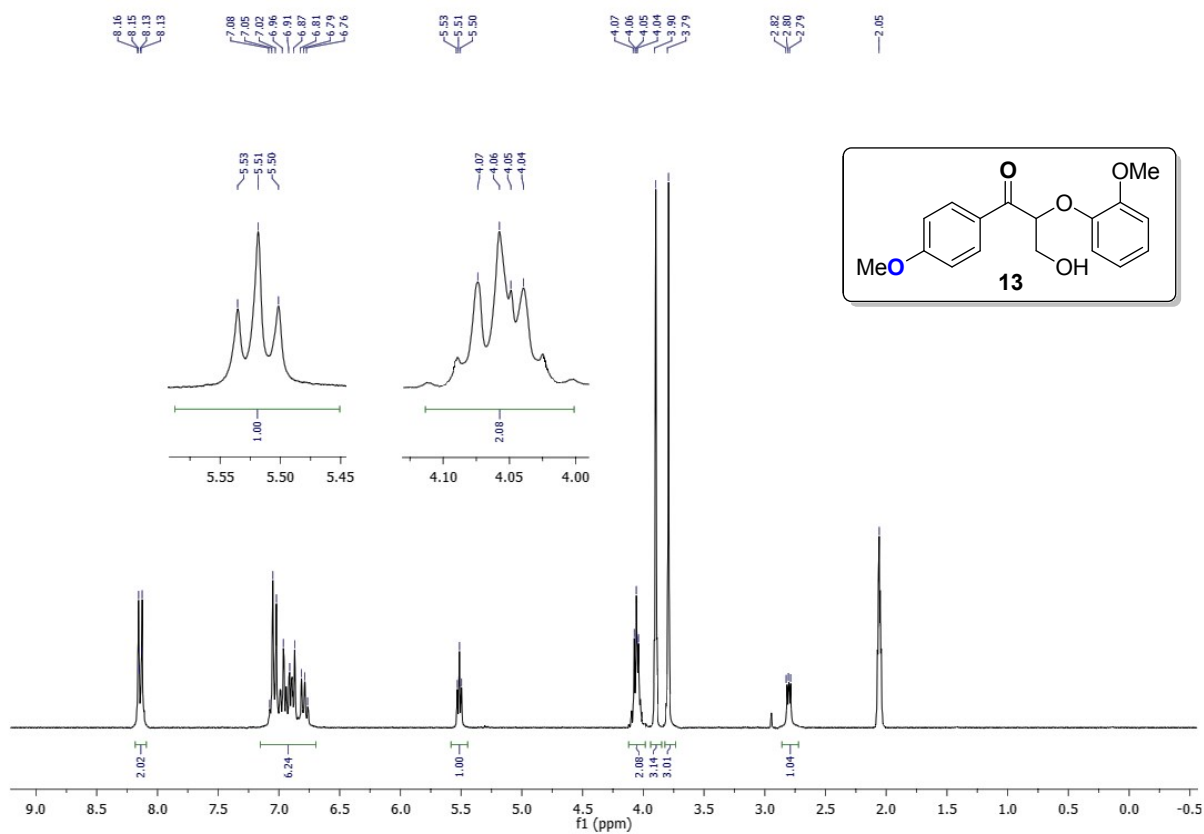

Figure S10. <sup>1</sup>H NMR Spectrum of **13** (300 MHz, acetone-d<sub>6</sub>).

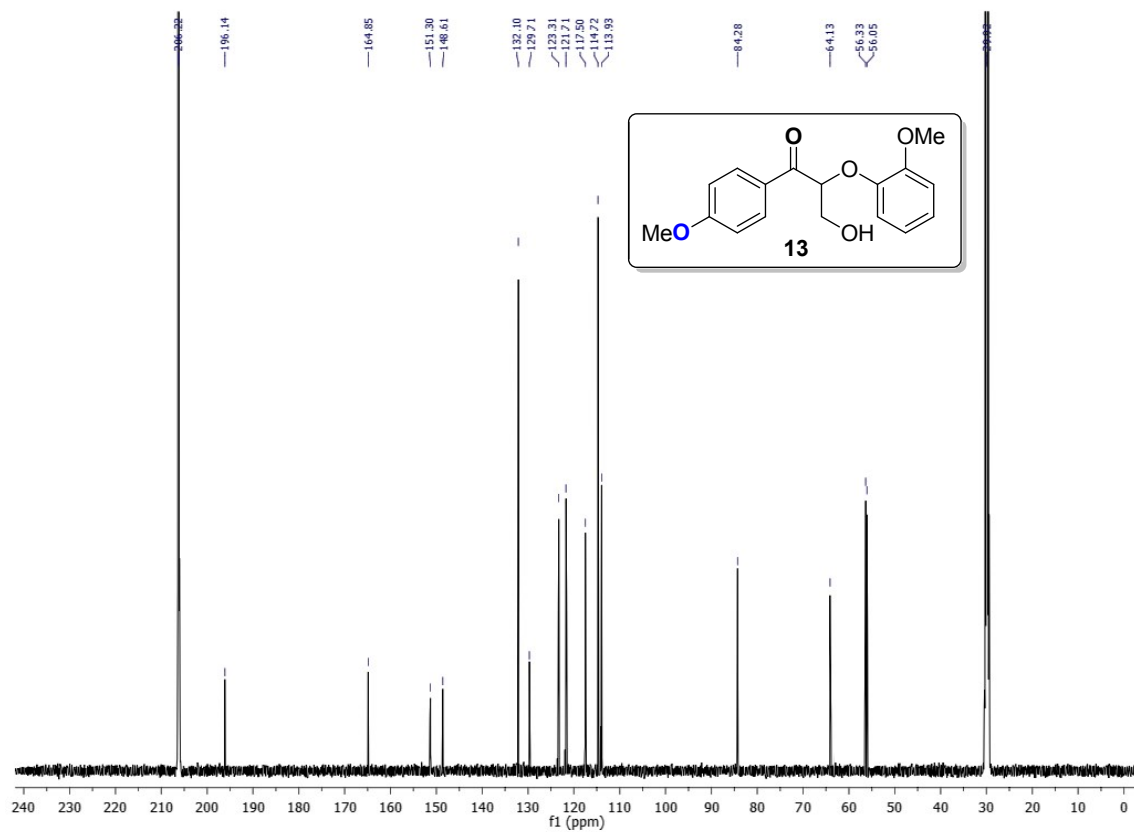

Figure S11. <sup>13</sup>C NMR Spectrum of **13** (75 MHz, acetone-d<sub>6</sub>).

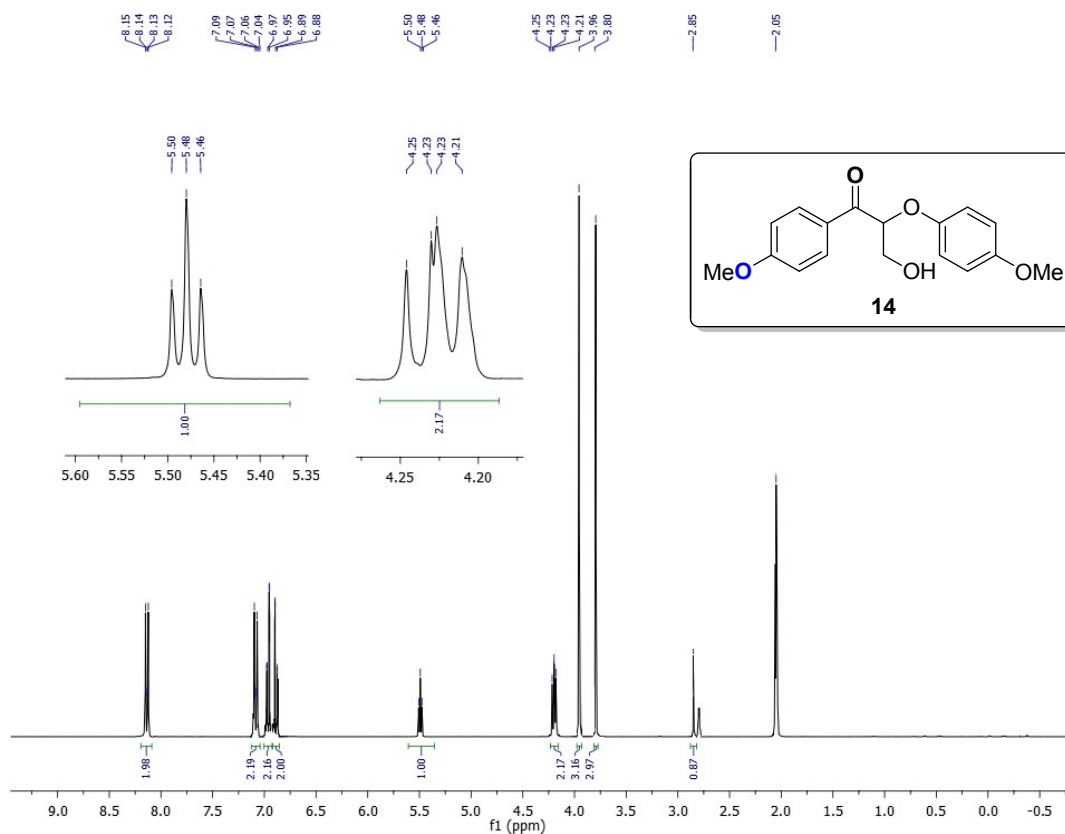

Figure S12. <sup>1</sup>H NMR Spectrum of **14** (300 MHz, acetone-d<sub>6</sub>).

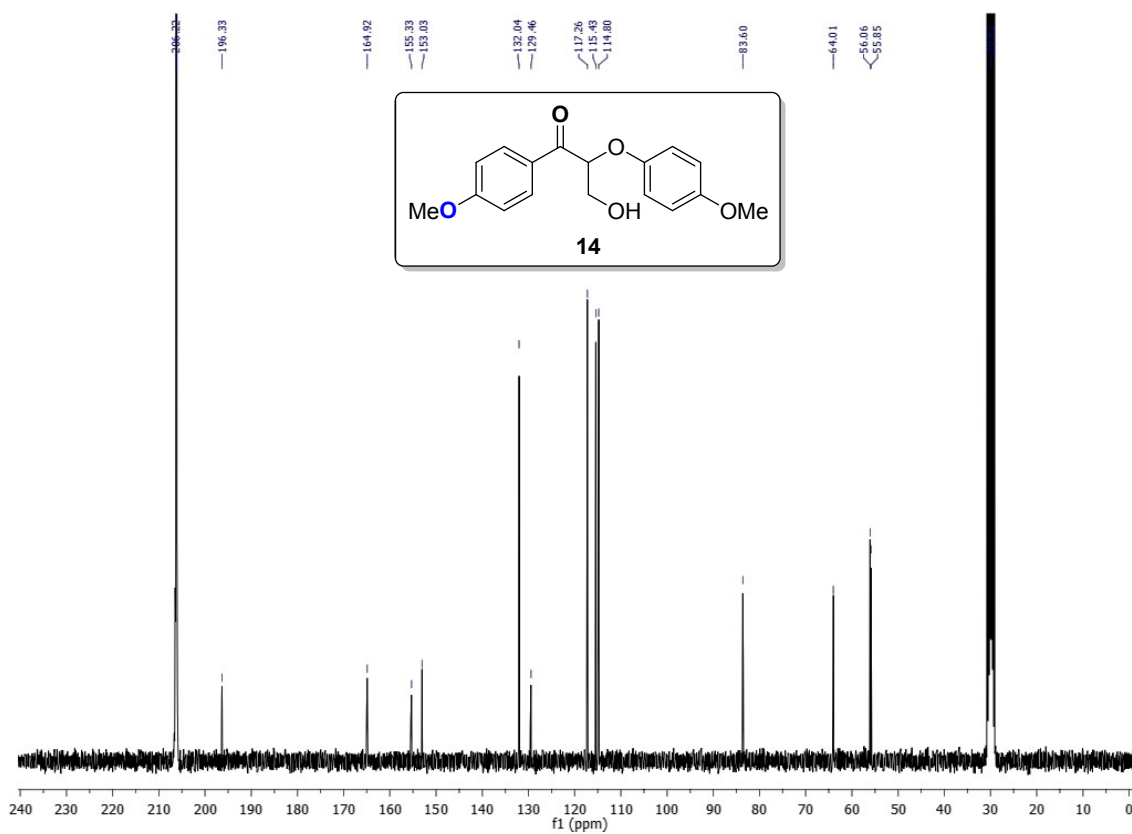

Figure S13. <sup>13</sup>C NMR Spectrum of **14** (75 MHz, acetone-d<sub>6</sub>).

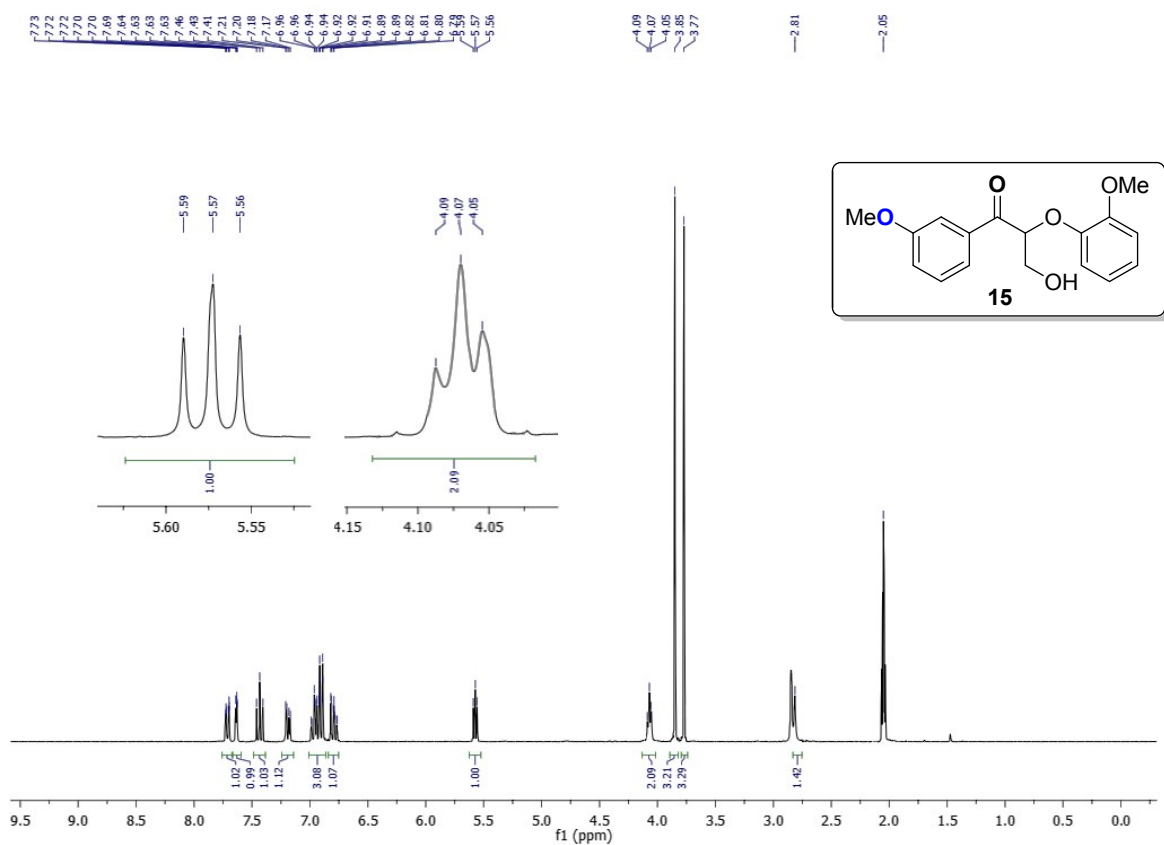

Figure S14. <sup>1</sup>H NMR Spectrum of **15** (300 MHz, acetone-d<sub>6</sub>).

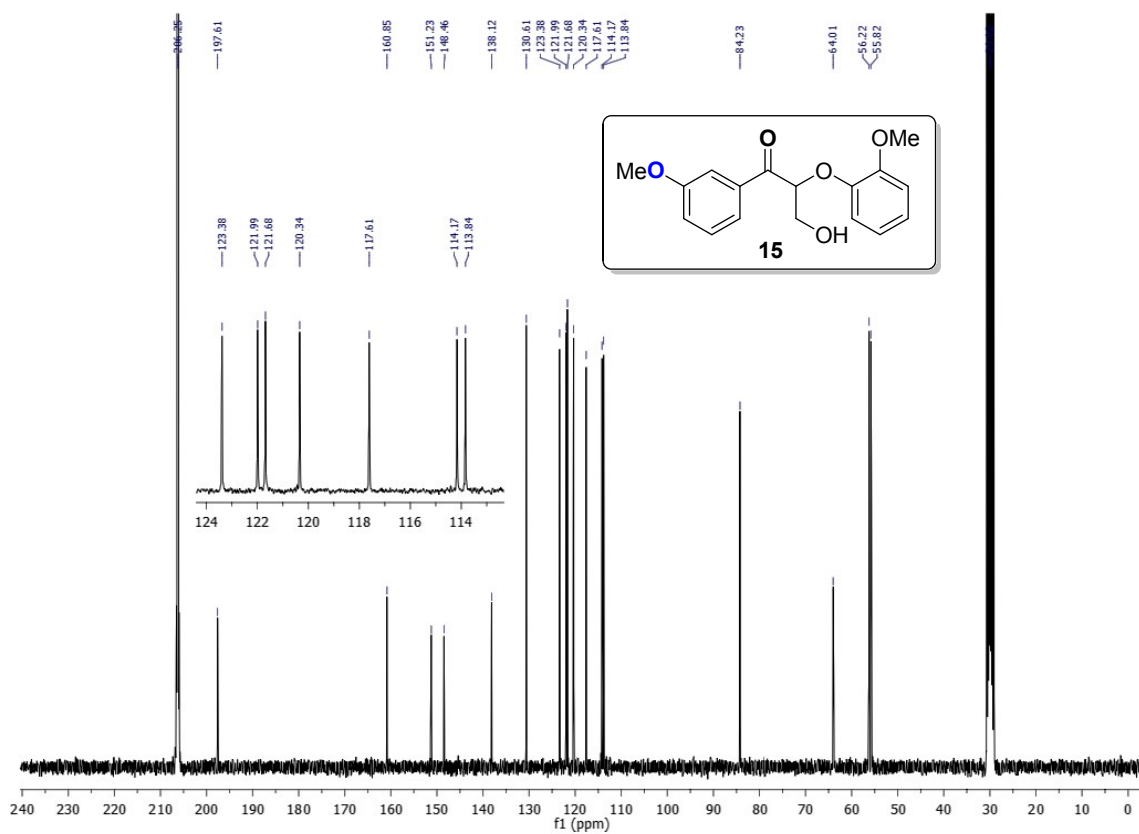

Figure S15. <sup>13</sup>C NMR Spectrum of **15** (75 MHz, acetone-d<sub>6</sub>).

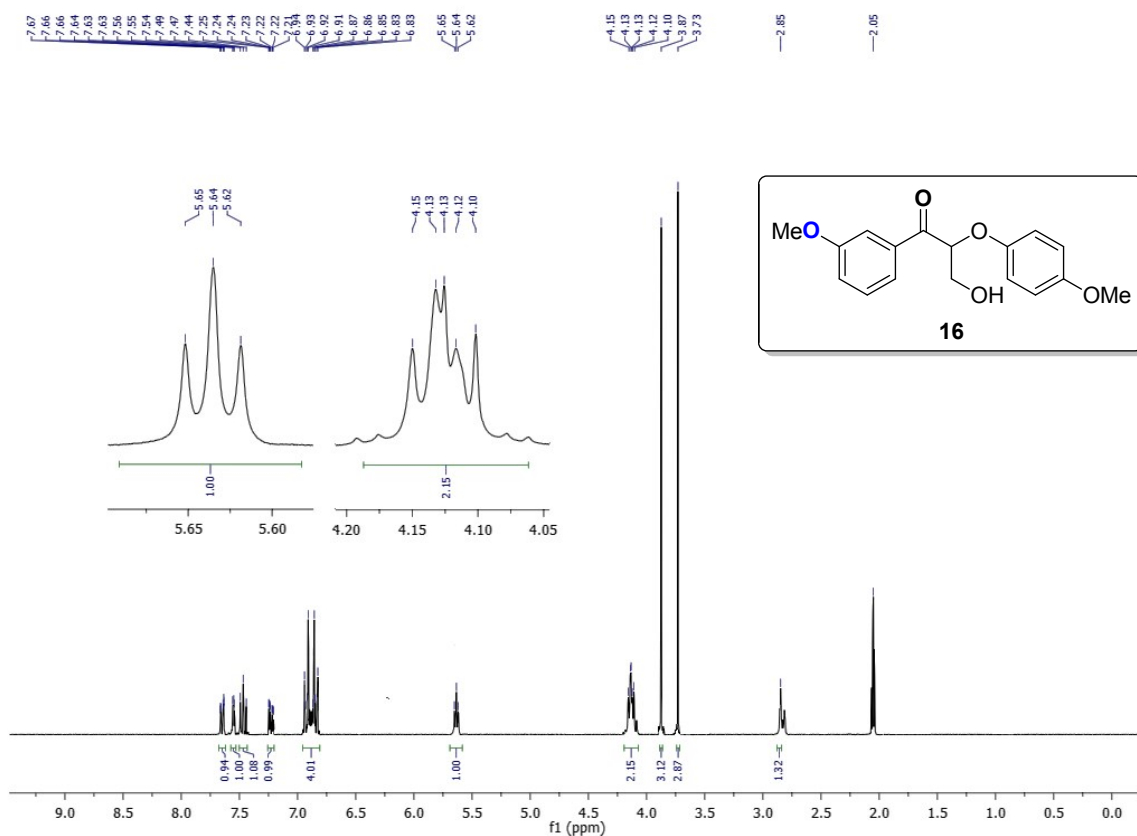

Figure S16. <sup>1</sup>H NMR Spectrum of **16** (300 MHz, acetone-d<sub>6</sub>).

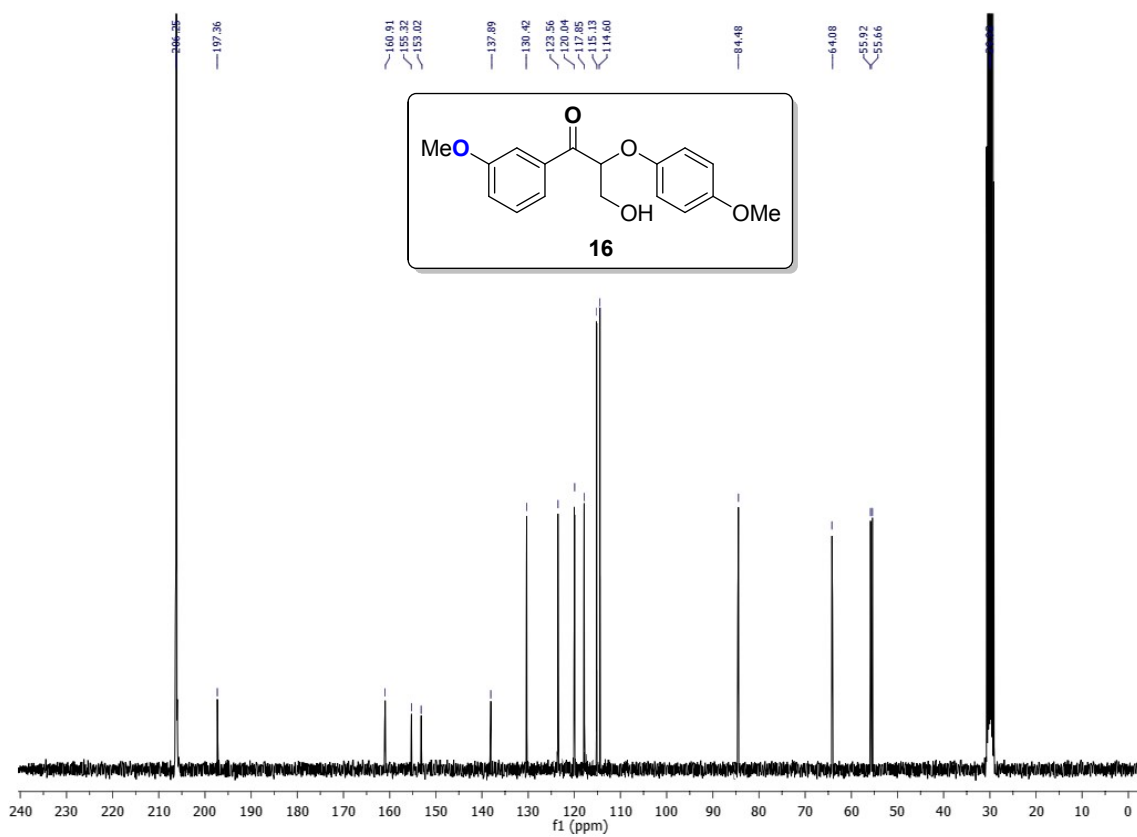

Figure S17. <sup>13</sup>C NMR Spectrum of **16** (75 MHz, acetone-d<sub>6</sub>).

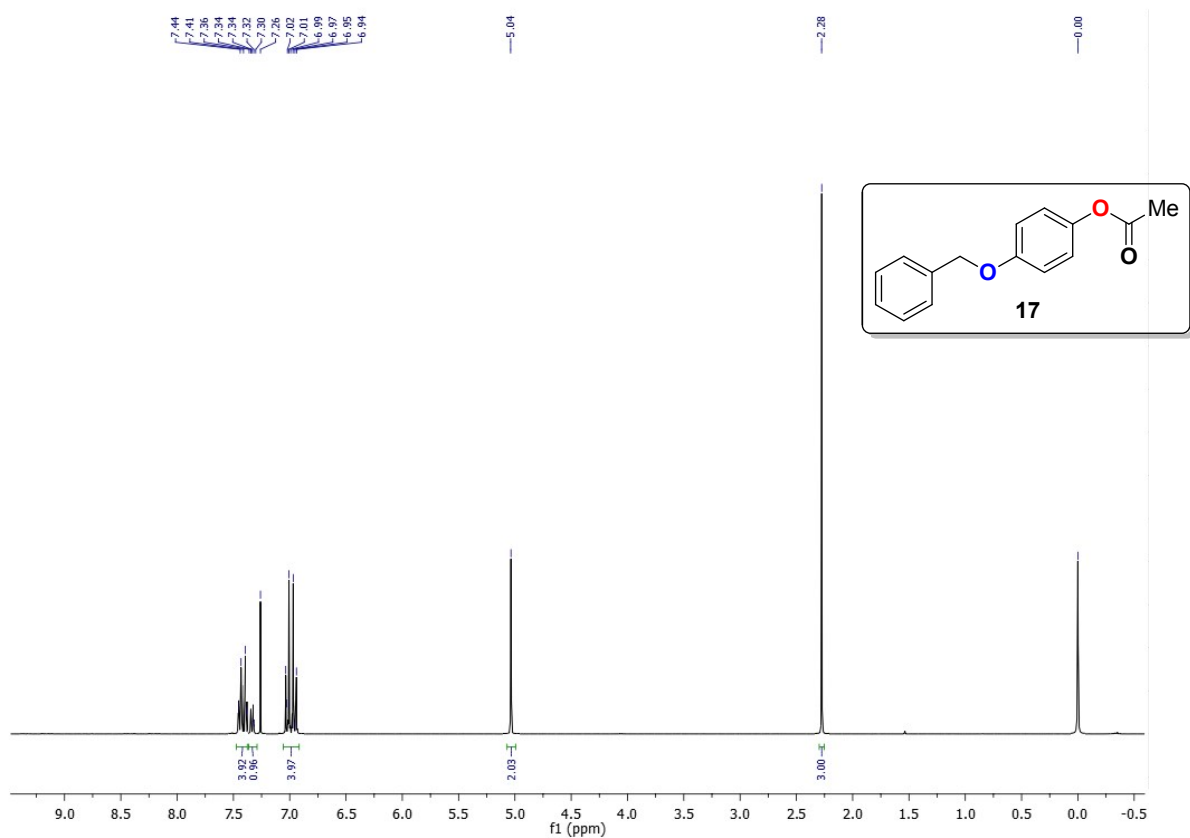

Figure S18.  $^1\text{H}$  NMR Spectrum of 17 (300 MHz,  $\text{CDCl}_3$ ).

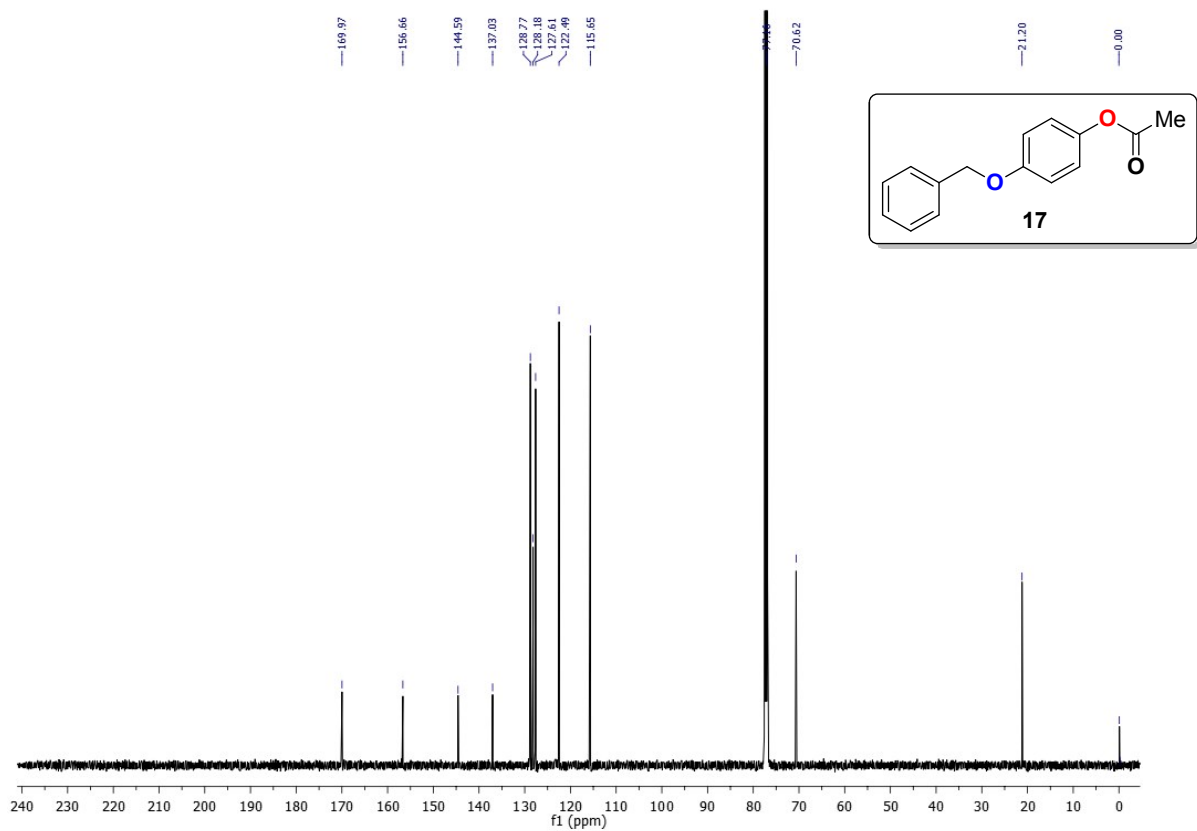

Figure S19.  $^{13}\text{C}$  NMR Spectrum of 17 (75 MHz,  $\text{CDCl}_3$ ).

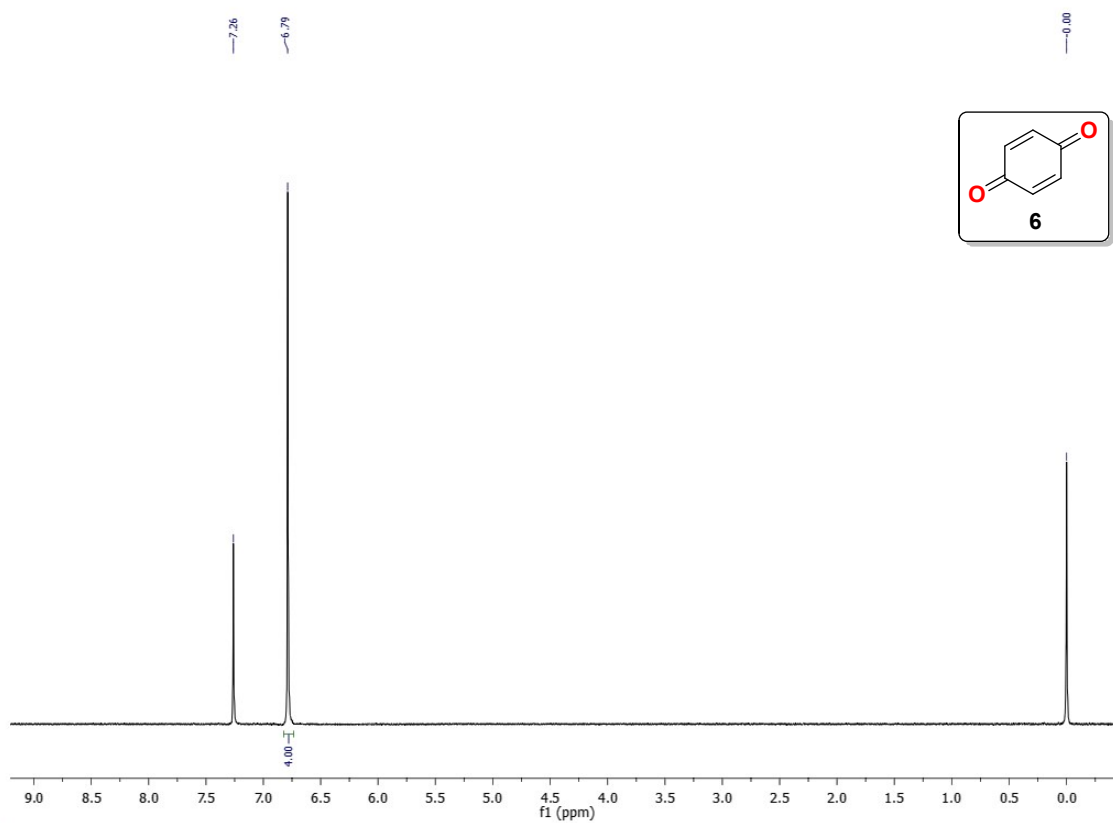

Figure S20.  $^1\text{H}$  NMR Spectrum of **6** (300 MHz,  $\text{CDCl}_3$ ).

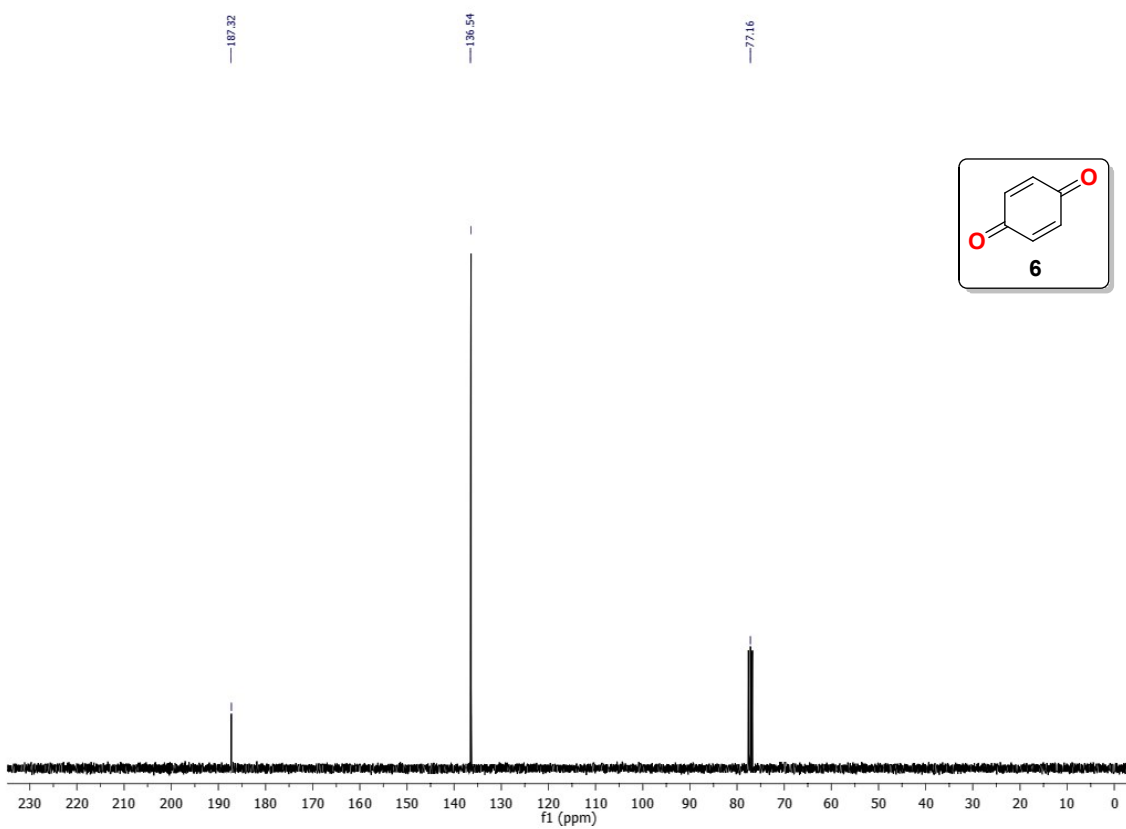

Figure S21.  $^{13}\text{C}$  NMR Spectrum of **6** (75 MHz,  $\text{CDCl}_3$ ).

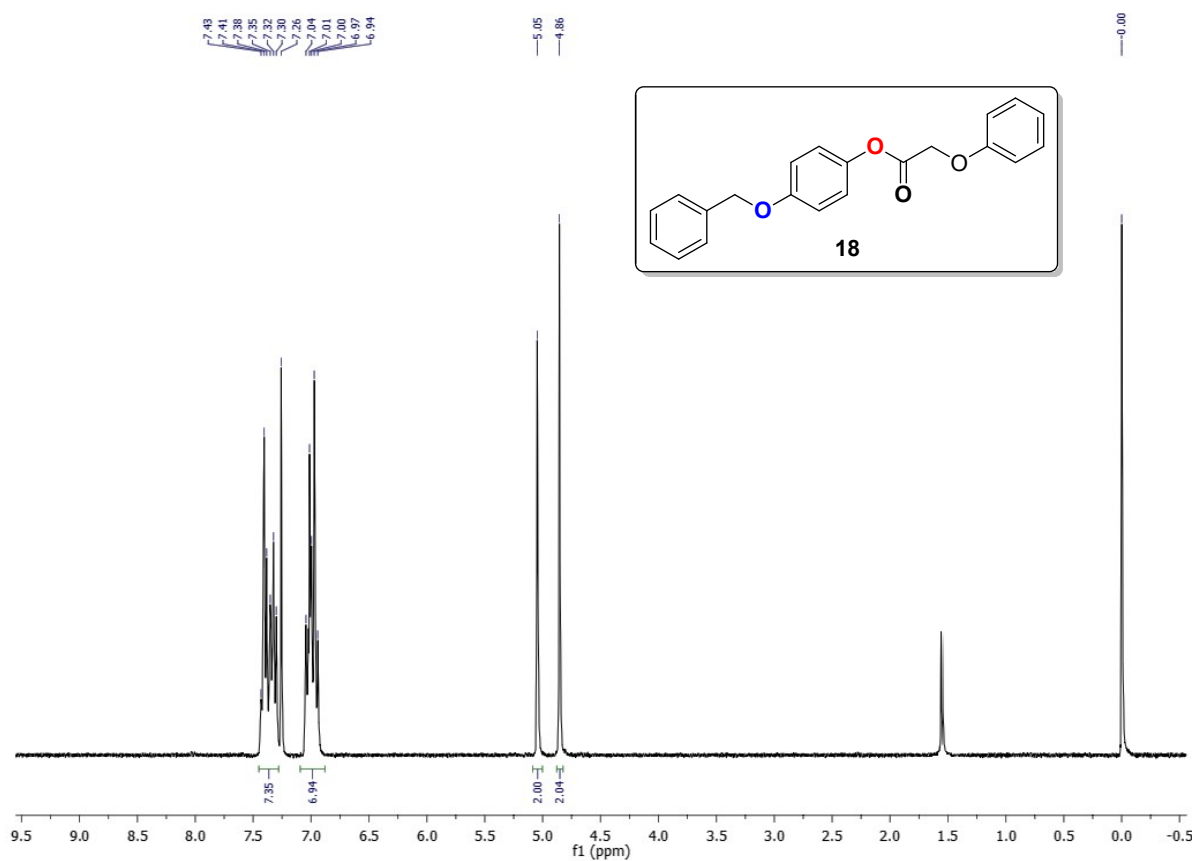

**Figure S22.** <sup>1</sup>H NMR Spectrum of **18** (300 MHz, CDCl<sub>3</sub>).

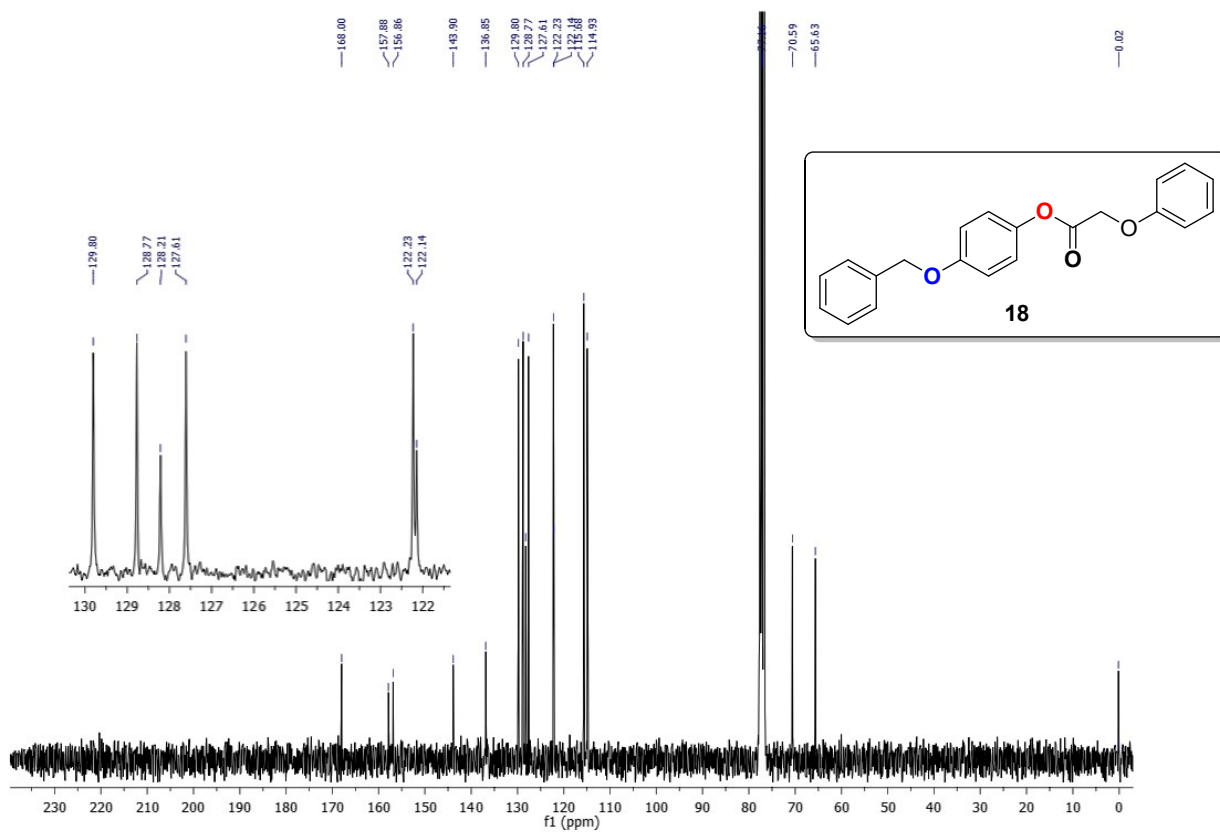

**Figure S23.** <sup>13</sup>C NMR Spectrum of **18** (75 MHz, CDCl<sub>3</sub>).



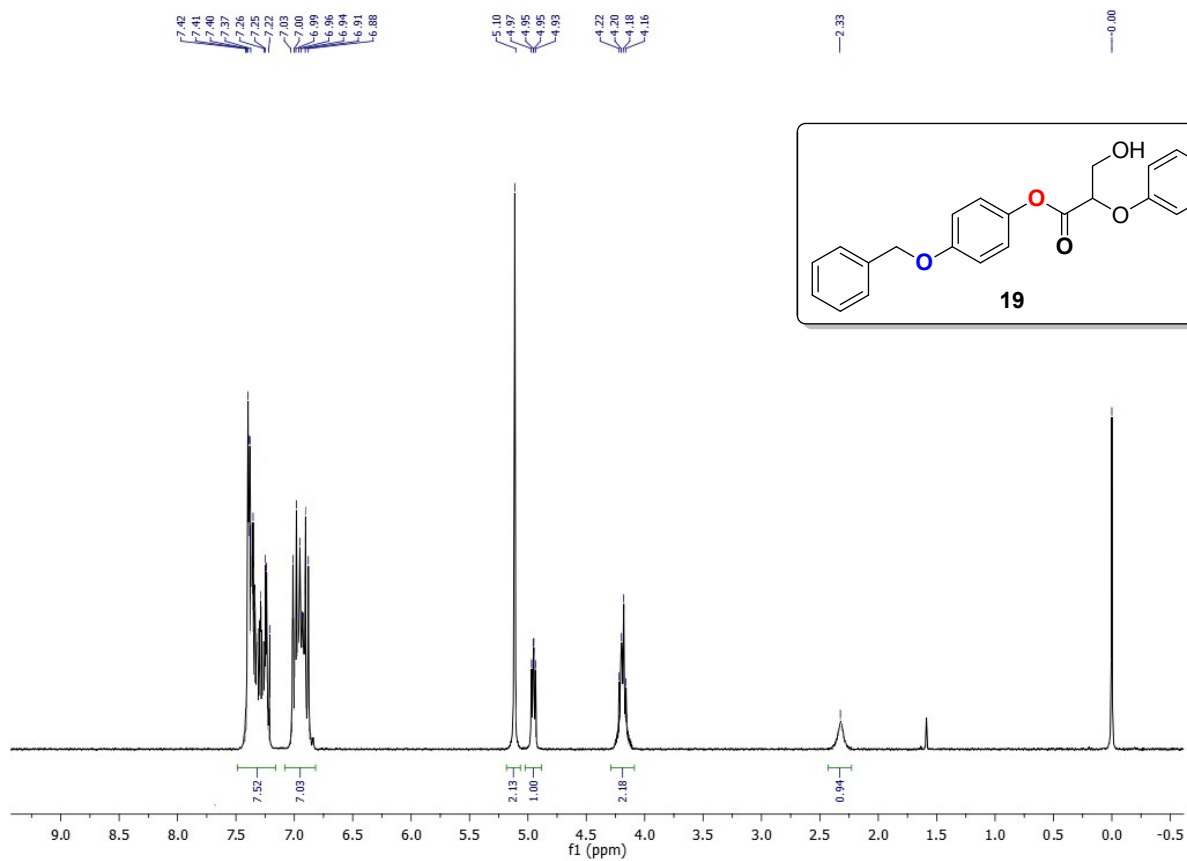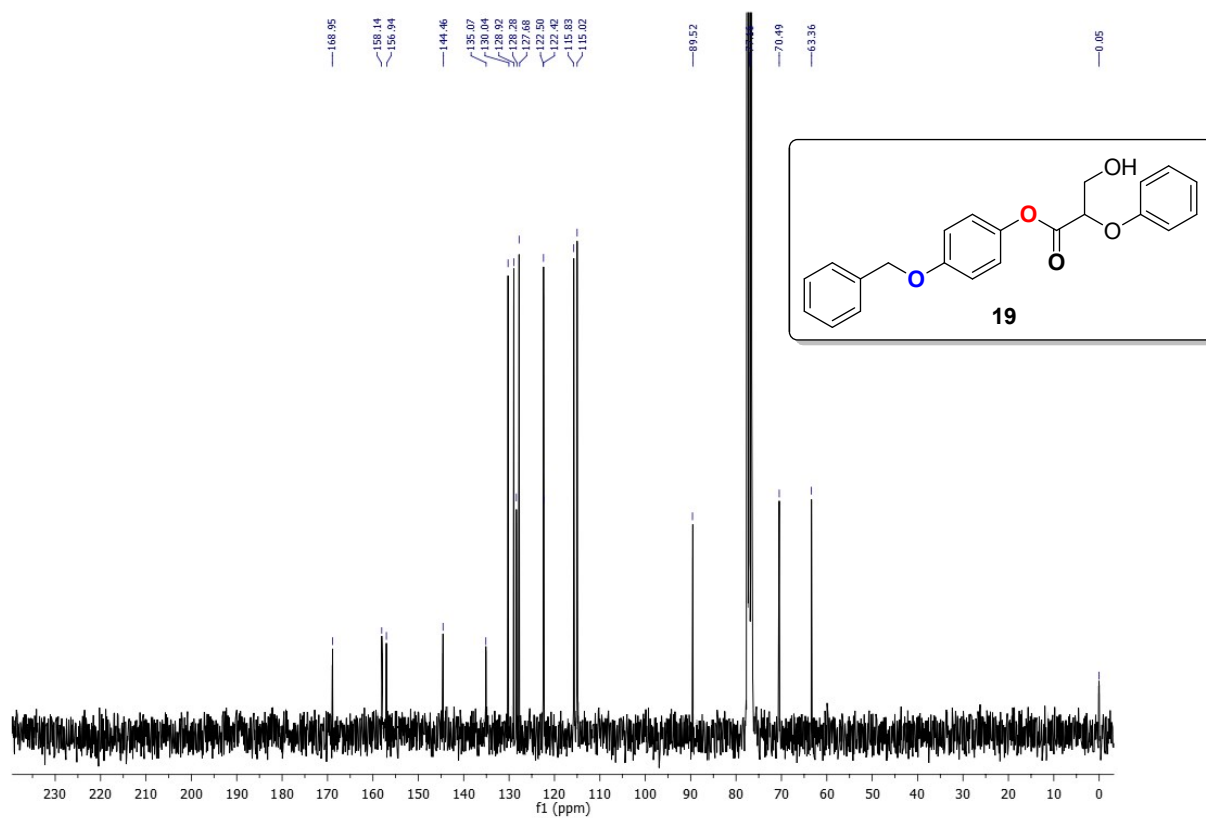

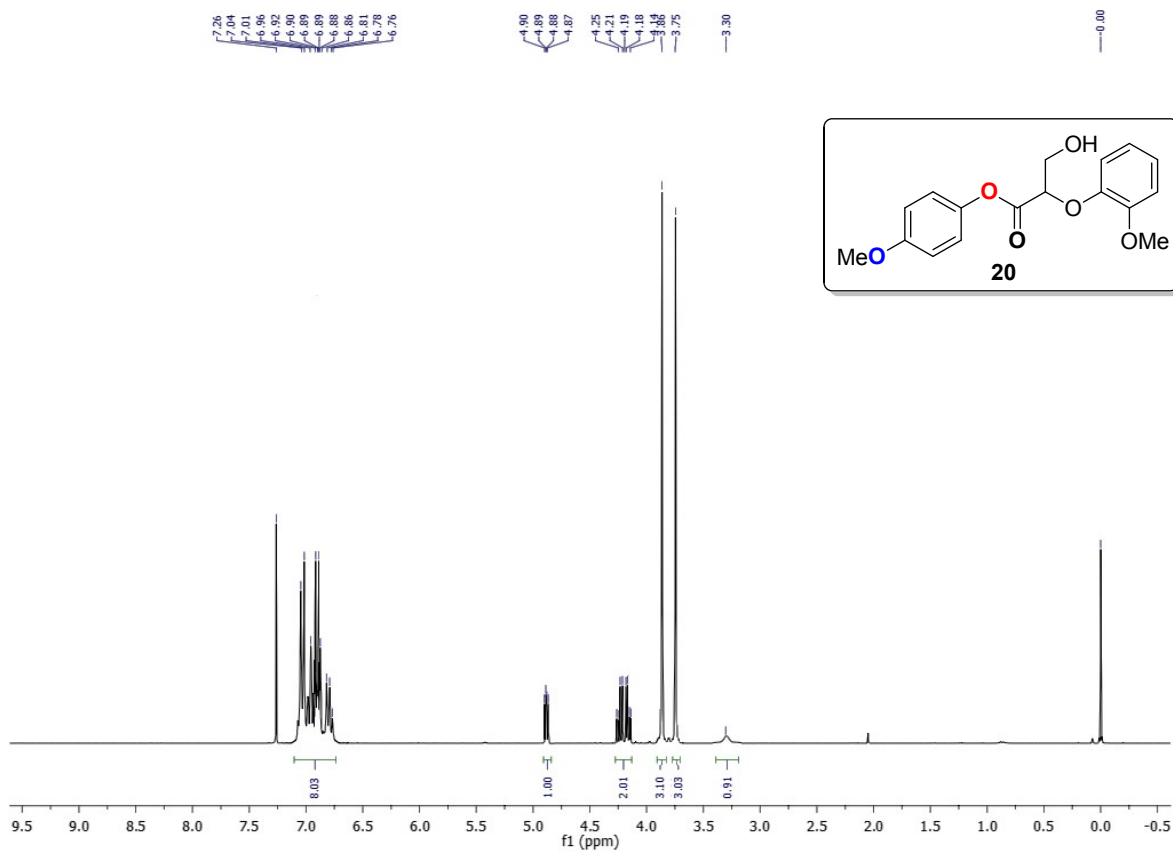

Figure S26. <sup>1</sup>H NMR Spectrum of **20** (300 MHz, CDCl<sub>3</sub>).

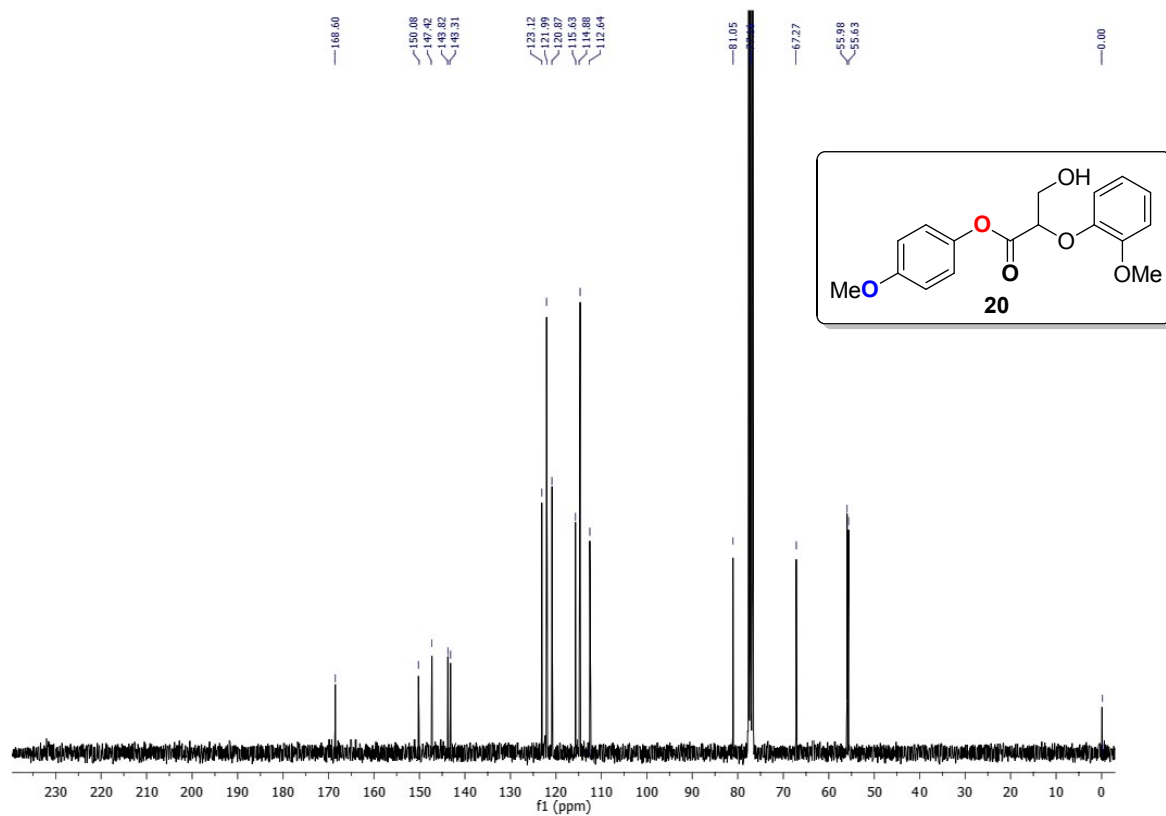

Figure S27. <sup>13</sup>C NMR Spectrum of **20** (75 MHz, CDCl<sub>3</sub>).

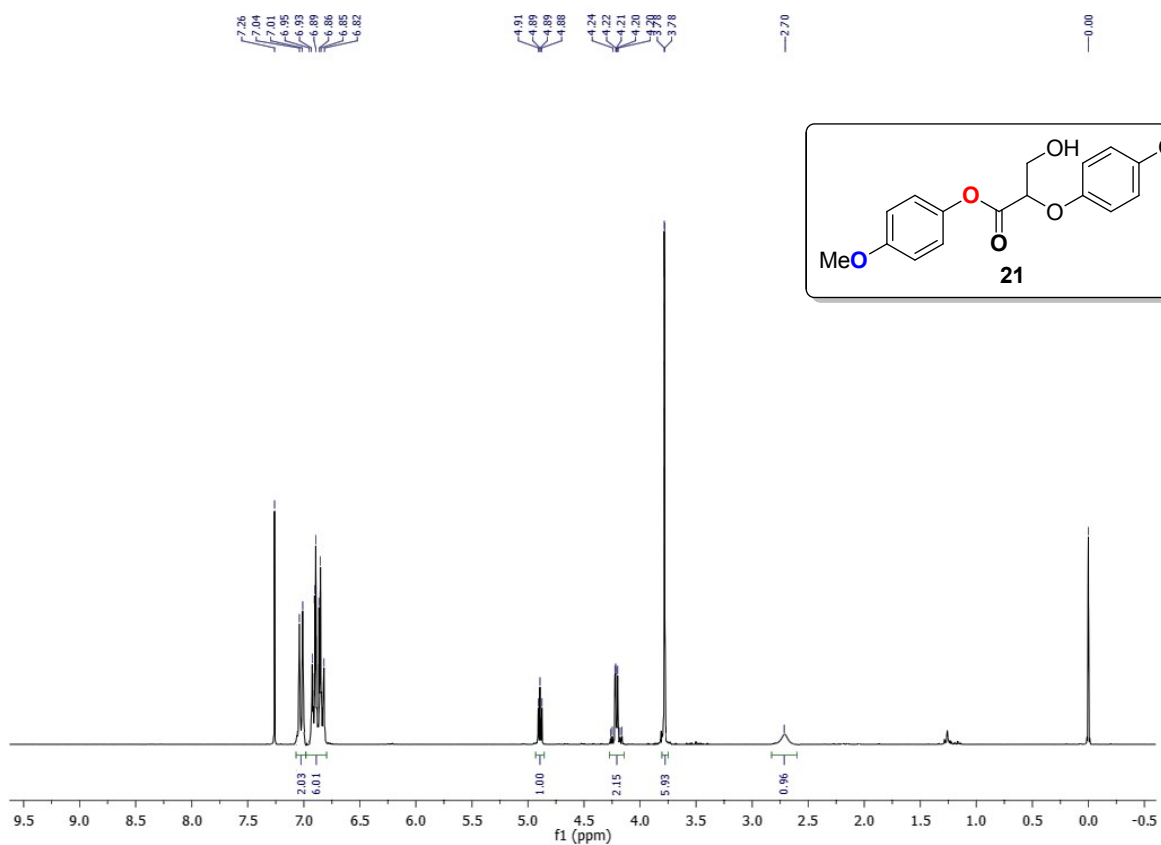

**Figure S28.** <sup>1</sup>H NMR Spectrum of **21** (300 MHz, CDCl<sub>3</sub>).

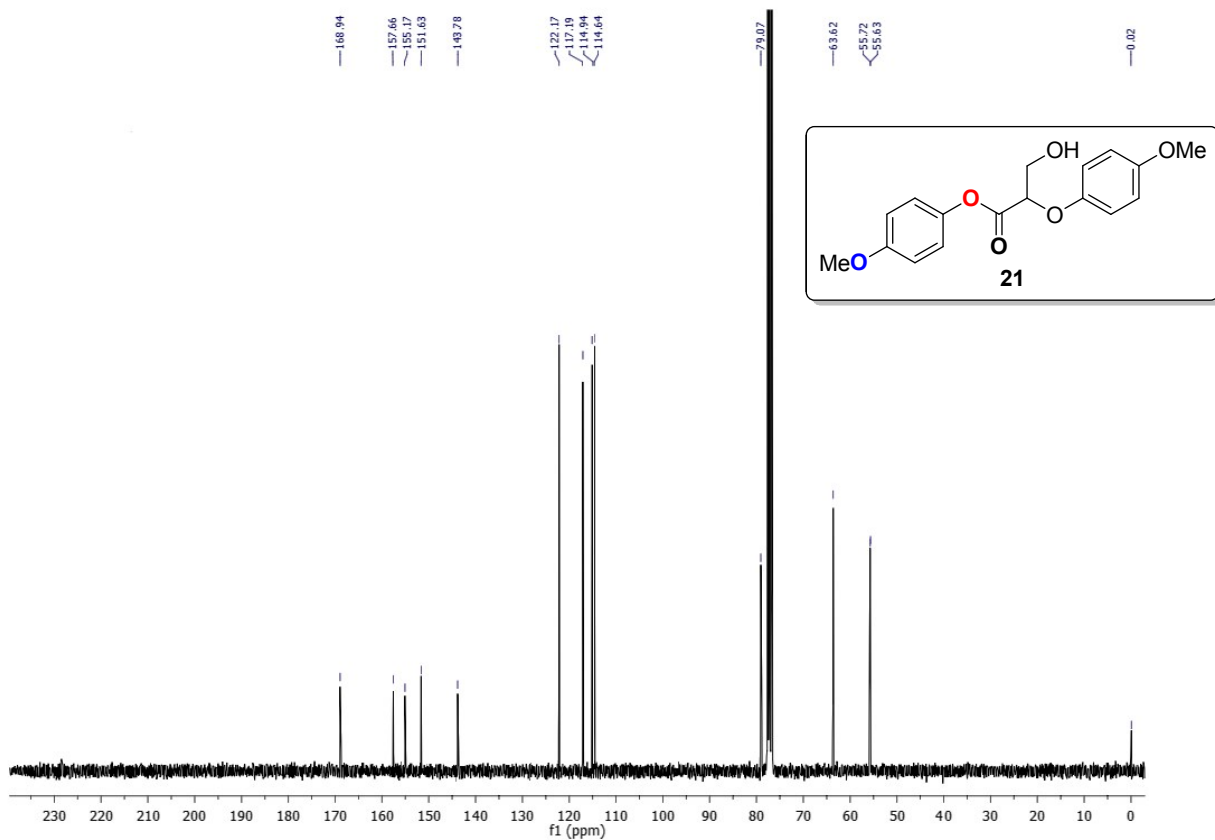

**Figure S29.** <sup>13</sup>C NMR Spectrum of **21** (75 MHz, CDCl<sub>3</sub>).

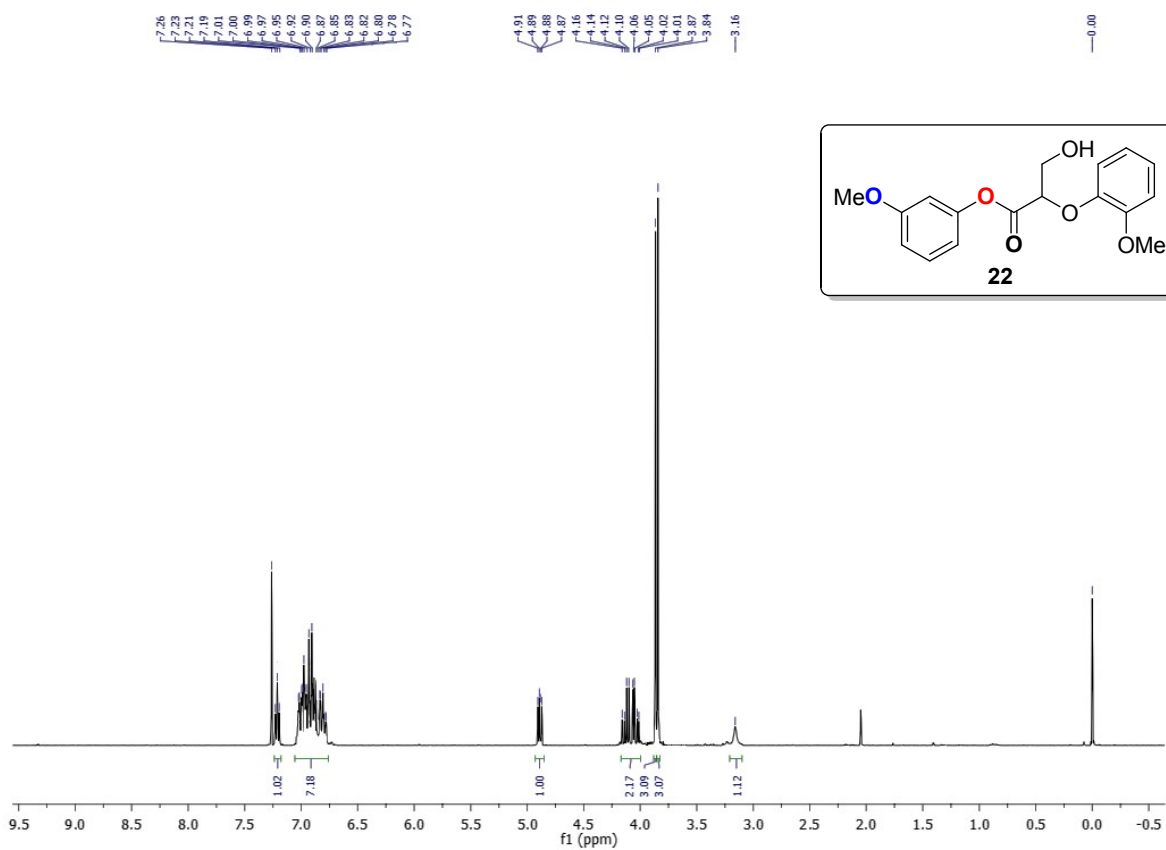

Figure S30. <sup>1</sup>H NMR Spectrum of **22** (300 MHz, CDCl<sub>3</sub>).

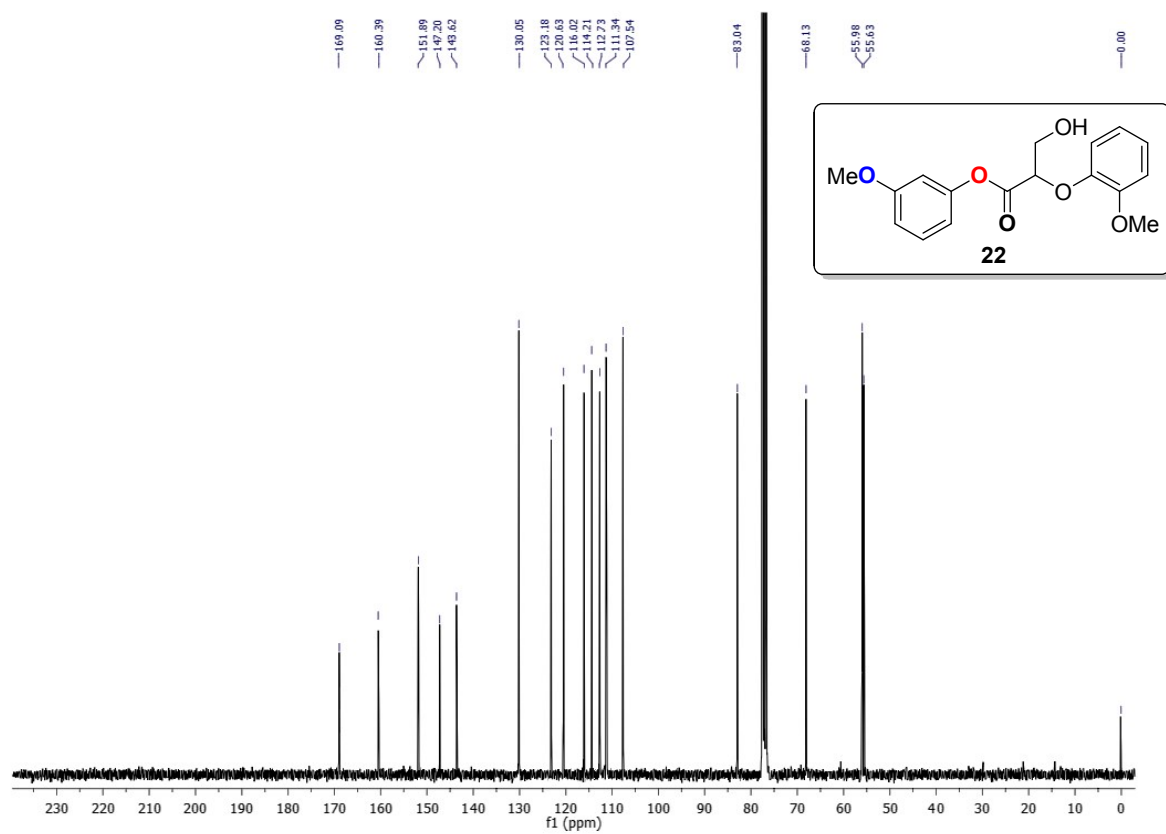

Figure S31. <sup>13</sup>C NMR Spectrum of **22** (75 MHz, CDCl<sub>3</sub>).

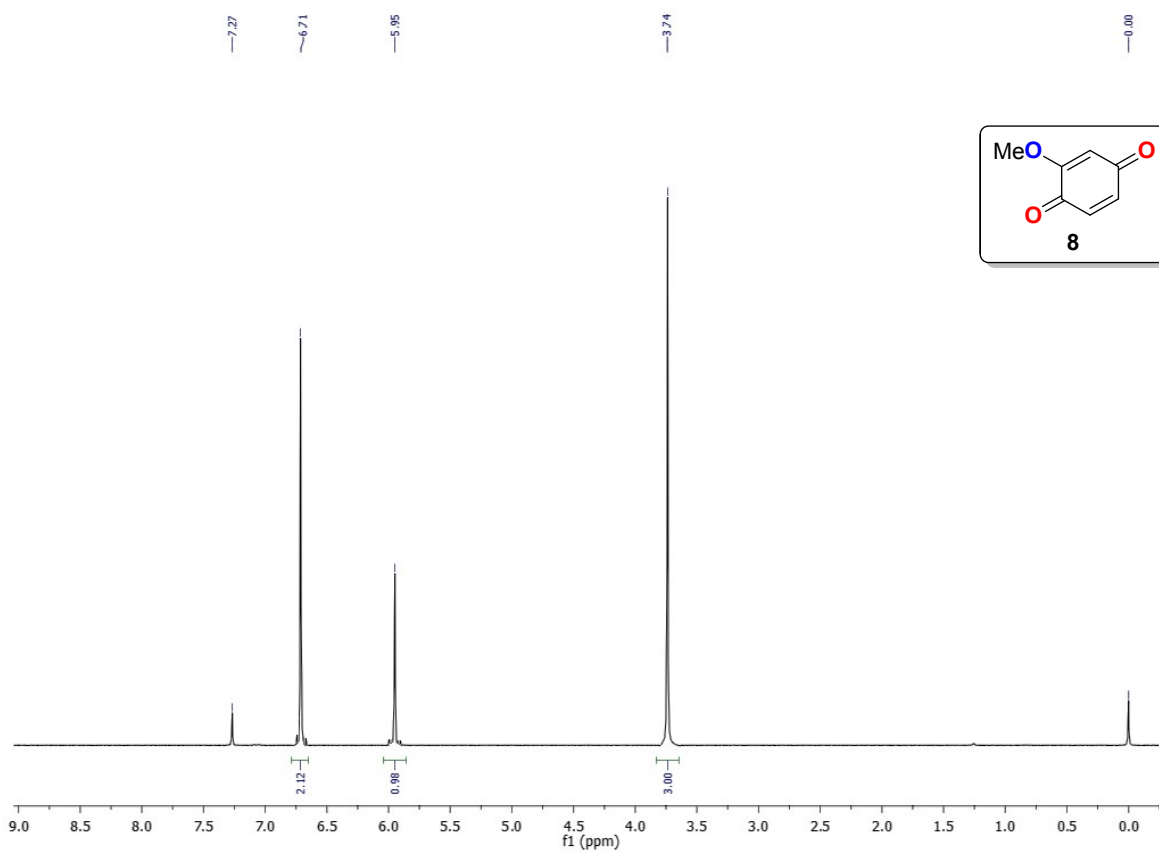

Figure S32. <sup>1</sup>H NMR Spectrum of **8** (300 MHz, CDCl<sub>3</sub>).

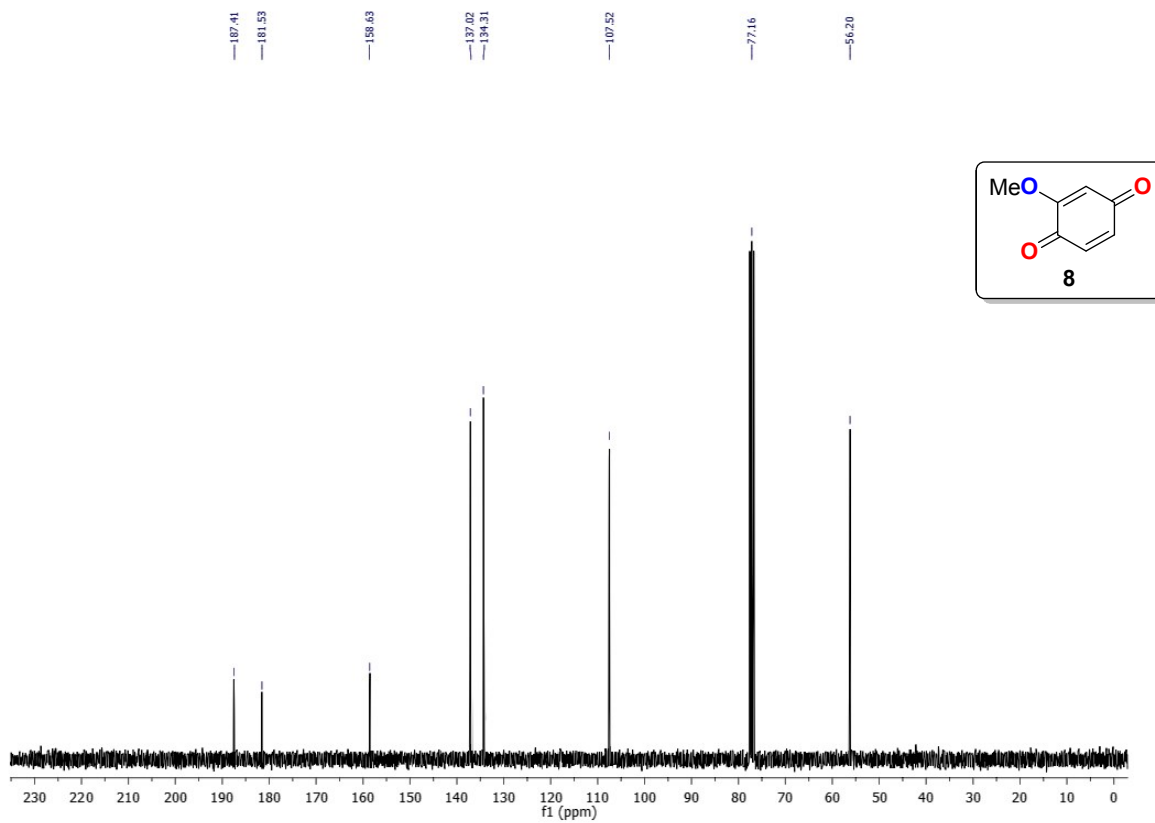

Figure S33. <sup>13</sup>C NMR Spectrum of **8** (75 MHz, CDCl<sub>3</sub>).

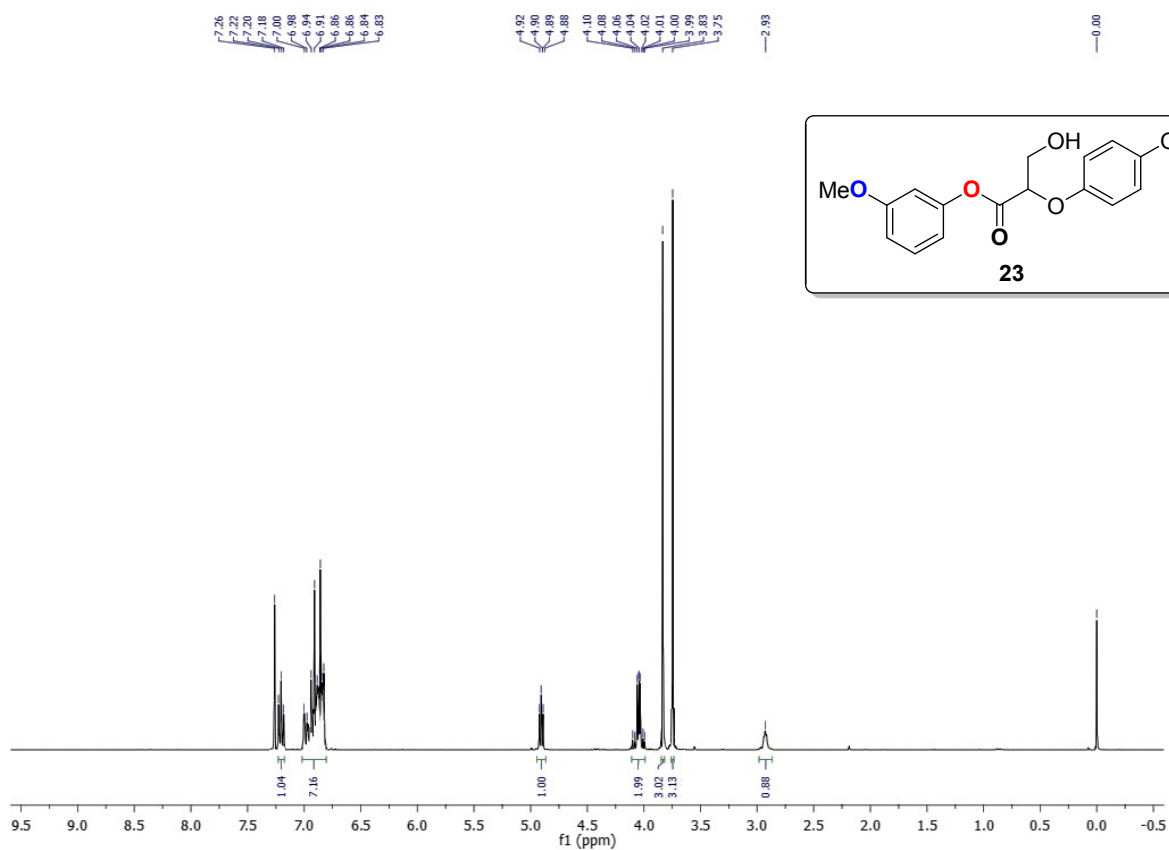

Figure S34.  $^1\text{H}$  NMR Spectrum of **23** (300 MHz,  $\text{CDCl}_3$ ).

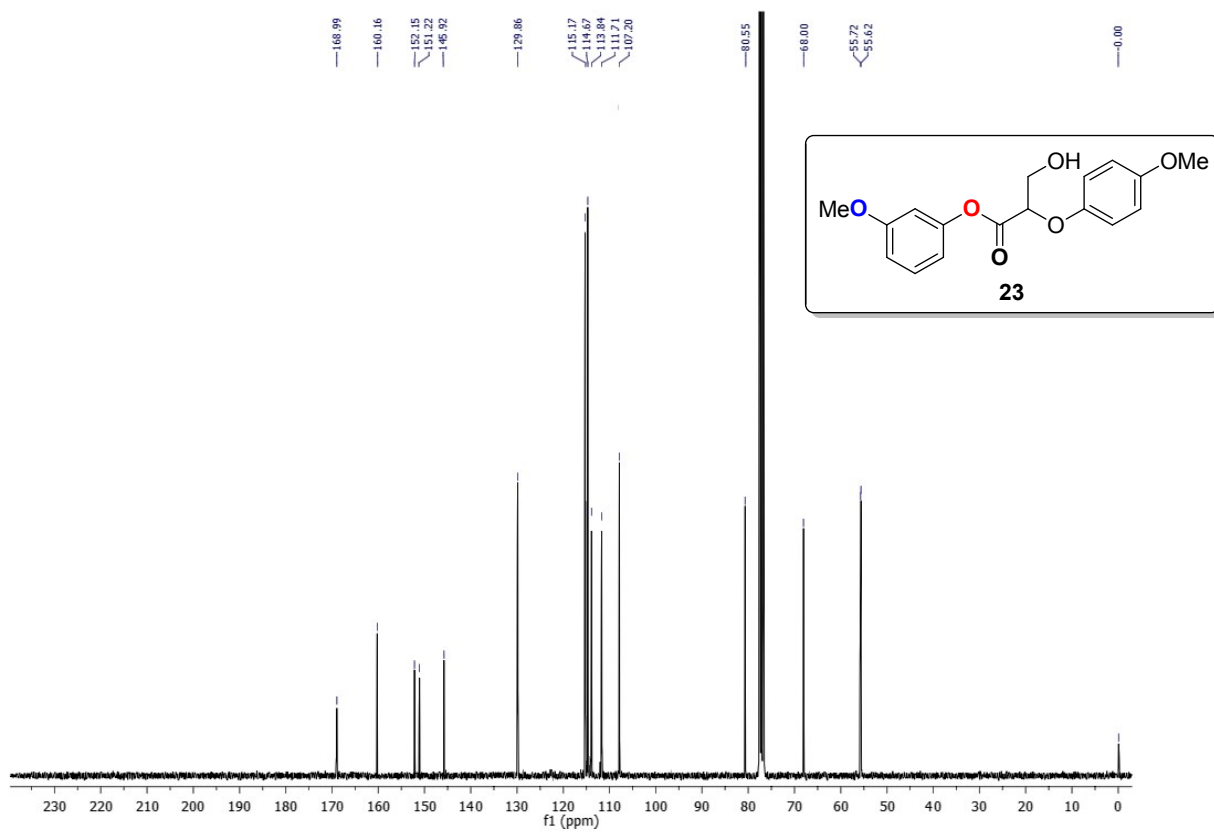

Figure S35.  $^{13}\text{C}$  NMR Spectrum of **23** (75 MHz,  $\text{CDCl}_3$ ).

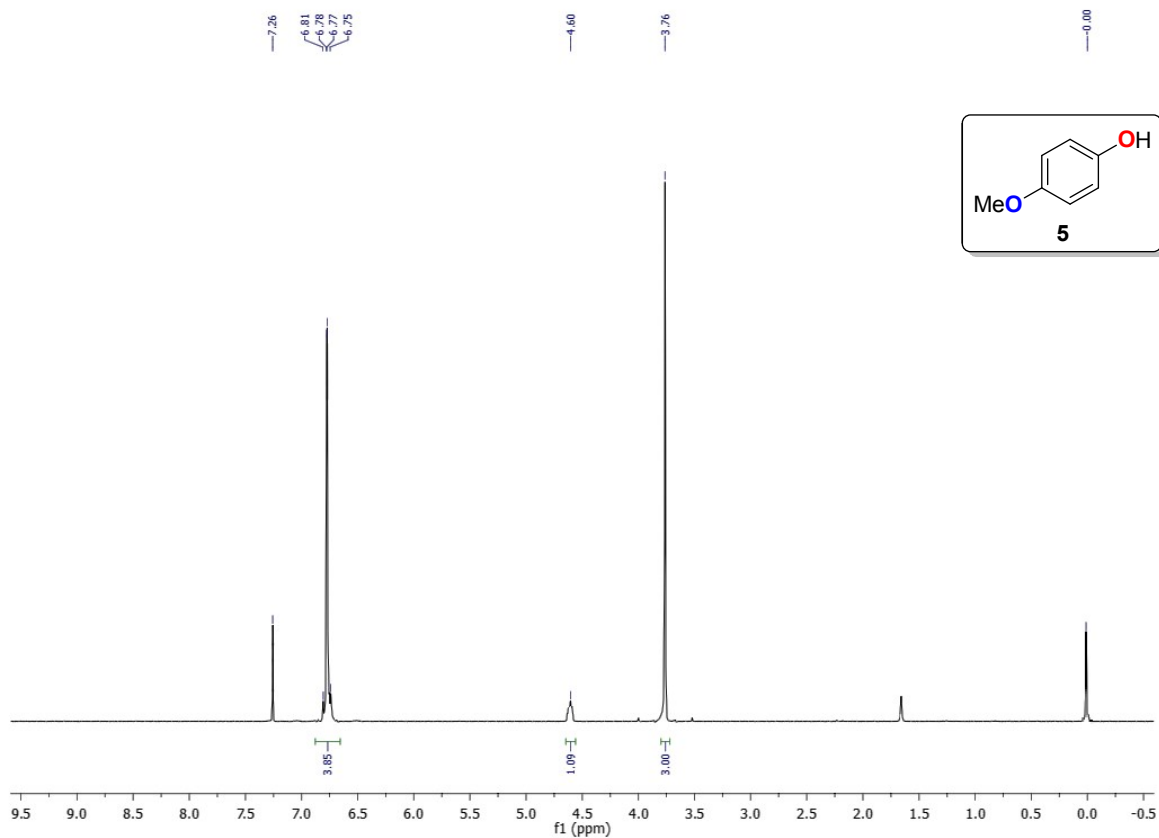

**Figure S36.**  $^1\text{H}$  NMR Spectrum of **5** (300 MHz,  $\text{CDCl}_3$ ).

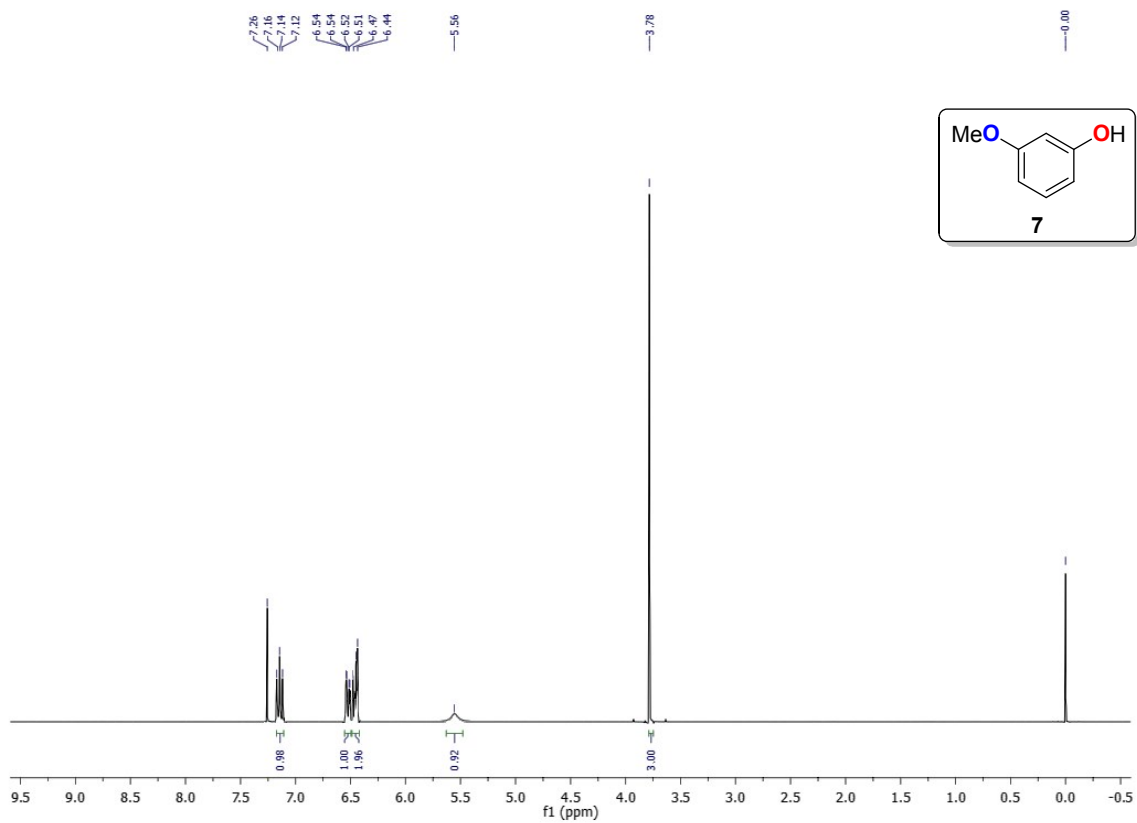

**Figure S37.**  $^1\text{H}$  NMR Spectrum of **7** (300 MHz,  $\text{CDCl}_3$ ).

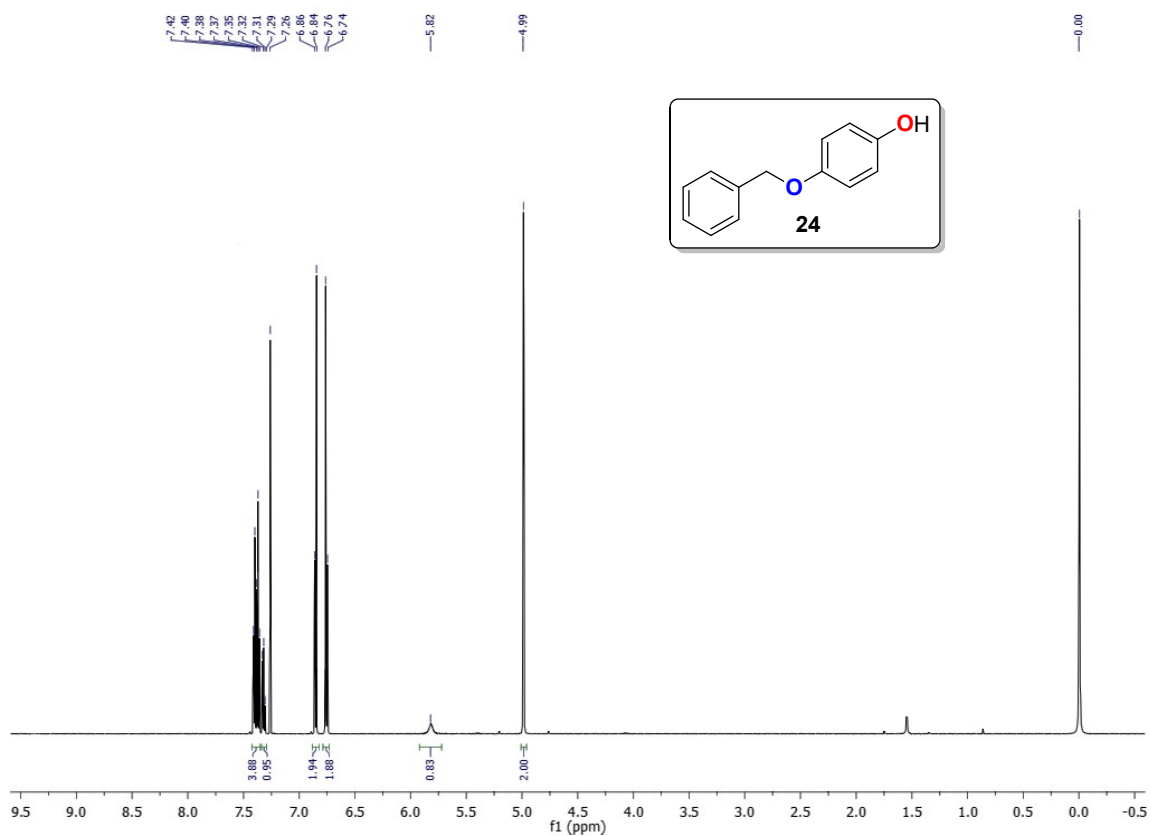

**Figure S39.**  $^1\text{H}$  NMR Spectrum of **24** (300 MHz,  $\text{CDCl}_3$ ).
